# Supplementary material for: Optimal tuning of multi-PID controller using improved CMOCSO algorithm
Source: PeerJ Comput Sci. 2024 Nov 19;10:e2453. doi: 10.7717/peerj-cs.2453 (PMC11622856; doi:10.7717/peerj-cs.2453)
Supplement: Supplemental Information 1 [file peerj-cs-10-2453-s001.xlsx]

## Sheet: Sheet1
P	I	D	P	I	D	P	I	D	P	I	D	ITSE	se	tr	ts	td	overshoot	ess	f_less	f_greater
61.5782	11.141	-0.120284	64.0068	0.984504	-0.425063	58.5526	2.18529	-0.518774	50.7094	10.3844	-0.575136	0.000955187	0.000818735	0.112322	0.476315	0.868339	0.207748	9.91857e-05	-1.6087	-0.709551	0
62.5169	20.3967	-0.120284	62.9194	0	-0.30098	62.6787	19.9053	0.0834927	60.1221	8.02692	-0.331426	0.0135593	0.00262893	0.0938639	1.43521	1.33969	0.244493	0.000477992	-1.67001	-0.712497	0
62.9949	3.43462	0.0969724	63.0661	0.397026	-0.555458	61.7146	2.25894	-0.606906	56.8461	10.1663	-0.403427	0.0281421	0.00483099	0.10081	3.98258	1.08874	0.200385	0.000978403	-1.68853	-0.829803	0
59.148	12.8155	0.0666308	64.2472	0	-0.477503	61.5034	1.1441	-0.31631	55.6816	13.6944	-0.401437	0.00326856	0.0018204	0.0983291	1.34995	0.944375	0.196835	0.000112113	-1.69813	-0.796309	0
24.2502	24.4328	-0.798522	69.2462	36.3767	-0.289322	63.6004	23.6496	0.082654	56.0576	2.85607	-0.329378	3.53342	0.0285096	2.95749	3.98712	0.0599341	3.88412	0.133327	-0.661115	-0.851694	0
24.3066	0	0.079302	58.9908	1.35079	-0.293701	62.4017	0	-0.428929	59.8762	11.5798	-0.341843	0.000368228	0.00038408	0.255239	0.432173	0.000254597	2.99808	2.19659e-05	-1.49972	-0.556203	0
22	147.772	-0.773549	69.944	16.5505	0.358764	78.2199	2.25912	-0.430103	80.1889	97.785	-0.40016	5.18271	0.0343256	0	4	11.9961	1.65395	0.152773	-0.630507	-0.85749	0
22.059	778.118	-0.792963	28.4	709.259	-0.539242	62.2604	378.995	-0.458382	52.9938	776.527	-0.511641	40.3933	0.131987	0.219325	3.99464	8.46261	2.417	0.127083	-0.179912	-0.974941	0
22.8305	777.414	-0.792988	29.9336	637.295	-0.659663	61.6677	411.843	-0.458382	54.704	776.358	-0.51066	40.1196	0.130861	0.0808003	3.99746	16.7646	1.47593	0.130346	-0.197091	-0.960628	0
22.013	778.118	-0.793006	28.4	718.037	-0.539235	62.2535	378.995	-0.428371	52.9938	775.238	-0.511641	40.1227	0.130873	0.221922	3.99648	9.73907	1.96855	0.125669	-0.156066	-0.98316	0
58.7005	1.59117	-0.138322	57.4782	0	-0.466297	62.7613	1.13698	-0.526841	56.718	29.3296	-0.441639	0.000719369	0.000672934	0.111628	0.383907	0.691222	0.205223	5.37096e-05	-0.954939	-0.675132	0
22.1331	147.772	-0.764429	41.2721	1.33999	0.358745	62.9059	2.25912	-0.443328	80.1889	100.662	-0.390978	5.7358	0.0385046	0.0400057	3.99993	386.88	2.85533	0.0958583	-0.350394	0.141256	0
26.9967	0.132033	0.095747	58.9901	1.30241	-0.293701	61.7829	0	-0.428929	57.039	0.295716	-0.341843	0.000373845	0.000402625	0.2143	0.431141	0.000451226	3.09153	8.74527e-06	-1.3287	-0.584007	0
25.8122	0.159572	0.0867001	64.1108	0.0705046	-0.293701	62.4039	0	-0.413858	59.3964	0	-0.340202	0.000362725	0.000379896	0.215429	0.429977	0.000270599	1.88755	7.23282e-06	-1.46396	-0.563265	0
27.0987	0	0.0367848	57.6573	1.2866	-0.293701	63.3573	20.7852	-0.428929	54.455	0.0813681	-0.351842	0.000368597	0.00040969	0.213149	0.391548	0.00416649	3.54288	2.9386e-05	-1.20718	-0.527763	0
22.7949	1.47596	-0.8	58.0907	737.203	-0.283805	62.6912	0	-0.442018	54.9191	87.5081	-0.344491	5.40522	0.0382195	0.0458653	3.99967	18.6334	3.69981	0.098886	-0.422223	-0.813217	0
24.3066	0	0.079302	59.0525	1.35079	-0.290965	62.7018	0	-0.428929	59.8762	0.21953	-0.336845	0.000366952	0.000368835	0.255345	0.432746	4.52277e-05	3.96238	3.49556e-06	-1.24328	-0.556029	0
26.565	784.436	-0.797745	26.5247	744.951	-0.507231	52.113	403.699	-0.457185	52.9938	818.649	-0.344214	30.6716	0.116367	0.0707841	3.99759	14.6551	1.42916	0.110415	-0.170902	-0.884847	0
24.2502	24.4328	-0.797365	69.2462	36.3767	-0.297465	63.6289	1.87525	0.082654	57.0863	2.85607	-0.329378	3.17041	0.0271792	2.96276	3.98967	0.065413	3.99192	0.128316	-0.589842	-0.859525	0
58.6743	1.39339	0.00762814	64.7192	731.392	-0.578673	61.8047	0	-0.448491	55.7467	20.8967	-0.455185	0.00128246	0.00106974	0.10265	0.769135	0.976648	0.187984	4.44042e-05	-0.314631	-0.80248	0
24.9771	0	0.0156587	65.26	1.95934	-0.541904	63.3201	0.0587846	-0.539162	55.5523	503.898	-0.16804	0.00039689	0.000434482	0.213128	0.493117	0.052329	2.11564	3.70641e-06	-0.33506	-0.545774	0
61.6128	11.1047	0.00668274	57.5807	6.57126	-0.291193	62.5475	0	-0.518161	61.2391	0	-0.44964	0.00190936	0.00135132	0.100424	1.01185	0.89801	0.198615	8.29583e-05	-1.21596	-0.829204	0
27.0659	0.132033	0.0131182	63.0225	0.0156687	-0.293701	60.3096	0	-0.499696	57.0542	0	-0.403279	0.000369175	0.000379208	0.210699	0.373557	0.00110906	2.37456	5.48465e-06	-1.2682	-0.57333	0
62.0469	812.99	0.0717125	58.7979	11.1577	-0.298547	61.4868	10.3791	-0.429194	61.4721	13.6944	-0.401438	0.00866046	0.00299034	0.0934191	2.24319	1.52445	0.203437	0.000178702	-0.422148	-0.847299	0
61.0052	11.8062	-0.00729262	62.7288	616.676	-0.473303	54.8143	3.40806	-0.429046	56.8188	6.52926	-0.420927	0.00140046	0.00111952	0.104526	0.82312	0.905076	0.185506	9.49224e-05	-0.380618	-0.816039	0
24.8807	0.00532325	0.0687974	60.2925	687.841	-0.278014	61.7329	0	-0.503503	53.0883	18.0116	-0.341518	0.000402863	0.000459986	0.231854	0.497859	0.0388591	1.51679	3.31382e-05	-0.337328	-0.604338	0
26.9967	0.132033	-0.116152	58.9901	23.5259	-0.293701	61.8172	0	-0.427686	57.0877	35.612	-0.341843	0.000410721	0.00045589	0.206243	0.242501	0.032108	0.33344	8.00331e-05	-1.13562	-0.355325	0
61.6095	4.02478	0.00208575	58.7291	1.14318	-0.290467	61.5094	0	-0.502578	53.0495	7.91953	-0.401437	0.0018063	0.00130429	0.100591	0.931868	0.89064	0.19948	4.82476e-05	-1.68716	-0.800179	0
64.3357	2.84496	-0.117221	63.0061	0.000231669	-0.303344	62.6787	2.89516	-0.0198918	56.8241	8.02692	-0.336656	0.00268202	0.00141027	0.0942368	0.881646	1.0781	0.226024	3.93405e-05	-1.73252	-0.743713	0
63.185	1.57082	0.0391759	57.6573	0	-0.458865	63.3573	1.11716	-0.428929	54.455	0.0813681	-0.351842	0.00424614	0.00208903	0.102622	1.58194	0.977684	0.196537	2.32793e-05	-1.7783	-0.824659	0
22.22	20.3877	-0.797225	46.5392	6.53591	-0.271011	52.2548	412.24	-0.46613	58.2323	8.57175	-0.469841	9.29012	0.0535681	0	4	13.3098	2.79061	0.138283	-0.791982	-0.738409	0
23.1851	1.53912	-0.138517	64.9436	0	-0.29355	67.6084	2.1696	-0.585729	56.0766	12.2758	-0.435993	0.000448823	0.000381139	0.22751	0.267324	0.0212226	0.404916	0.000101797	-1.12931	-0.224573	0
30.2937	781.172	-0.794869	26.7575	5.41848	-0.507074	52.025	405.635	-0.466244	52.9969	818.649	-0.475594	24.6305	0.107042	0.0652209	3.99957	19.8419	1.1716	0.0726121	-0.537702	-0.712176	0
62.9949	2.75723	0.0969724	63.0661	30.9542	-0.311622	62.4037	2.25894	-0.606906	56.8461	6.74743	-0.403404	0.0375047	0.00558147	0.0959961	3.98432	1.23787	0.223101	0.0013296	-1.46507	-0.847043	0
55.3109	0	0.00840361	59.0434	1.3498	-0.419474	52.1205	7.16457	0.145762	57.0837	0	-0.425144	0.00614117	0.00186794	0.102029	1.08123	1.1216	0.239396	2.07177e-05	-1.76109	-0.753098	0
27.0987	0	0.079302	58.991	1.2866	-0.291147	62.4053	3.09701	-0.428929	57.4545	0.227546	-0.351854	0.000367094	0.000397934	0.214225	0.423261	0.000509281	1.74334	8.76845e-06	-1.79851	-0.60311	0
61.6356	11.8062	-0.0916603	58.8353	13.2303	-0.473146	62.2722	3.40518	-0.428963	56.7131	6.52926	-0.476489	0.000865939	0.000804332	0.105333	0.52805	0.760279	0.200793	0.000113395	-1.61278	-0.751073	0
62.5169	13.6378	-0.120284	62.7275	29.988	-0.293702	62.6787	0.113022	-0.604345	60.1221	8.02692	-0.331426	0.000925205	0.000870101	0.102093	0.569627	0.820687	0.198638	0.000128724	-1.36527	-0.738538	0
57.618	2.74333	0.0163097	63.2247	1.34527	-0.56173	62.3986	2.25005	-0.599164	82.4539	10.1693	-0.392223	0.00176745	0.00120379	0.100917	0.824716	0.974811	0.203159	3.8468e-05	-1.64591	-0.780504	0
65.2096	816.645	0.0717125	63.1357	11.1577	-0.298547	61.4492	2.25127	-0.429194	61.4658	6.69769	-0.401438	0.0423386	0.00615578	0.0914754	3.98635	1.68955	0.197432	0.00161056	-0.361337	-0.822095	0
61.6113	11.1047	-0.014925	57.522	687.421	-0.196484	62.3285	0	-0.528201	61.1126	851.764	-0.446356	0.00185541	0.0012742	0.0984531	0.916156	1.15471	0.183015	6.97562e-05	-0.273596	-0.763739	0
22.7817	38.6175	-0.797763	58.0754	746.53	-0.283537	51.8439	391.828	-0.120051	54.9191	81.995	-0.349077	7.26373	0.0467794	0.0432065	3.99994	34.24	2.62093	0.113698	-0.276988	-0.706429	0
61.6535	8.03124	0.0717125	67.6504	1.14621	-0.291661	62.4506	0	-0.41561	55.6793	14.0188	-0.413061	0.00897239	0.00298428	0.0973083	2.26962	1.1807	0.196022	0.000104357	-1.08351	-0.806199	0
26.5616	784.436	-0.779403	26.5247	0.908988	-0.29101	62.1774	403.699	-0.466643	53.1166	818.649	-0.351051	19.3052	0.0937884	0.039258	3.99856	12.4401	1.61612	0.115089	-0.238054	-0.9528	0
24.239	20.4015	-0.798522	68.1107	36.4971	-0.289322	63.6004	23.6861	0.0740477	56.0576	2.91185	-0.329378	3.14386	0.0273205	2.96682	3.99029	0.0428857	3.99544	0.125428	-0.728548	-0.844471	0
62.5169	20.3967	-0.123743	62.9194	1.36272	-0.30098	62.6998	19.9053	0.0834927	60.126	8.18432	-0.331426	0.0130329	0.00258483	0.0940534	1.43888	1.29111	0.245029	0.000475655	-1.20334	-0.710552	0
62.1834	2.75793	0.171571	62.925	1.05624	-0.519498	62.3651	1.98673	-0.609859	61.0032	538.593	-0.317393	3.05607	0.0331425	0.0826895	3.99595	9.42179	3.13131	0.0189454	0.251573	-0.852831	0
27.1515	0	0.109575	58.991	1.2866	-0.57446	66.6792	3.15757	-0.428767	54.3941	0.0813681	-0.454888	0.000416406	0.000435238	0.204778	0.419564	0.000149106	3.63553	7.91367e-06	-1.33308	-0.596663	0
22.2072	16.8863	-0.772847	52.5058	6.53591	-0.271011	78.0481	412.24	-0.430959	79.8685	8.57175	-0.323442	1.00705	0.0172712	0.0478686	3.99704	152.292	0.352085	0.0422448	1.26866	-0.757111	0
22.1331	147.772	-0.764429	69.7387	1.33999	0.358745	63.3489	2.25912	-0.443328	80.1889	62.8829	-0.390978	5.51208	0.0368765	0.0357928	3.99998	1375.24	1.76013	0.092784	-0.409436	0.139879	0
25.1441	1.2944	-0.137738	64.9426	0	-0.296386	62.7426	2.42937	-0.585729	51.0635	11.3206	-0.461189	0.000477063	0.00043551	0.210535	0.291043	0.0800443	0.339154	8.42865e-05	-1.00022	-0.241971	0
27.0735	0.132033	0.0959382	58.9901	1.30241	-0.290985	61.7829	0	-0.428929	57.039	0.295716	-0.341843	0.000374197	0.000404073	0.21426	0.429207	0.00194065	1.33299	8.67319e-06	-1.40513	-0.583918	0
64.4096	7.97355	0.0168398	65.2222	0.941924	-0.538816	63.815	2.94477	-0.41561	60.0511	13.6944	-0.413061	0.0035886	0.00191738	0.0979766	1.46052	0.971425	0.204586	8.90838e-05	-1.23212	-0.797245	0
22.059	778.118	-0.792963	69.6912	709.259	-0.539242	62.2604	8.26988	-0.503801	56.5909	776.527	-0.511641	25.7443	0.105096	0.186301	3.98893	10.6103	1.77977	0.0869932	-0.182232	-0.996617	0
26.539	784.436	-0.797745	26.5247	757.384	-0.507231	52.113	27.7113	-0.457185	56.0353	819.271	-0.344214	28.452	0.11006	0.0715676	3.99882	12.8534	1.04707	0.121482	-0.2285	-0.962367	0
62.4561	13.6378	-0.123709	56.4628	0	-0.513044	58.7769	0.0724072	-0.604345	51.1298	8.02692	-0.33779	0.000926611	0.000776676	0.1109	0.49729	0.846452	0.201512	9.88464e-05	-1.19357	-0.710495	0
67.0208	4.01251	0.10542	69.2793	0.929277	-0.542488	62.7739	2.27425	-0.495176	53.0495	7.59515	-0.40347	2.50387	0.0292285	0.57993	3.99441	5.1964	3.61445	0.0291498	-0.545328	-0.848276	0
62.2951	7.96848	0.0735851	62.925	0	-0.522771	62.3651	1.93619	-0.611811	55.6805	894	-0.402331	0.00672405	0.00258567	0.0998253	2.13906	1.19601	0.201821	0.00010165	-0.397493	-0.812846	0
24.0051	0.880578	0.0874706	58.6742	13.0844	-0.272192	63.04	7.63447	-0.428897	60.3346	0.21953	-0.40139	0.000373191	0.000394635	0.269389	0.459434	0.000896738	1.69918	7.63673e-05	-1.12282	-0.544713	0
27.0987	11.1947	0.0367848	57.5732	1.2866	-0.294303	63.3573	20.7852	-0.424377	54.5023	0.0813681	-0.351842	0.000395444	0.000412134	0.21365	0.360675	0.0118515	0.832949	0.000322676	-0.827127	-0.527467	0
59.3252	12.8155	0.073968	64.2866	0	-0.300018	64.0078	1.25032	-0.31631	60.3176	13.6944	-0.401205	0.0053162	0.00234207	0.0951361	1.70552	1.11854	0.196343	0.000100052	-1.11583	-0.797794	0
22.7722	1.47596	-0.8	69.6401	714.705	-0.297591	62.7186	0.0899939	-0.379705	79.5249	88.0608	-0.391656	4.20113	0.0307534	0.0447363	3.99966	23.2332	3.68971	0.0870915	-0.307633	-0.832175	0
61.6095	13.3135	0.00208575	58.7291	1.14318	-0.290467	61.815	0	-0.502578	53.0495	7.91953	-0.401437	0.00180929	0.00130663	0.10199	0.932382	0.883431	0.201765	0.00010037	-1.13654	-0.774825	0
62.1834	2.75793	0.171571	57.5091	0	-0.466315	62.3517	1.98673	-0.609859	61.0032	532.49	-0.317393	3.05457	0.0331253	0.0829406	3.99778	9.1311	3.39779	0.01837	0.121781	-0.850911	0
61.6113	4.83418	-0.00703029	57.522	689.535	-0.202691	62.3285	0	-0.527113	61.1126	0	-0.421386	0.00193109	0.00131845	0.0974161	0.936484	1.01321	0.201938	3.41333e-05	-0.336183	-0.769991	0
61.6356	148.519	-0.0916603	58.8061	13.2303	-0.473146	62.2722	3.40518	-0.428632	79.5415	64.1901	-0.452943	0.00101264	0.000920907	0.0991328	0.800309	0.953445	0.183047	0.000161227	-0.565775	-0.723951	0
22	96.4252	-0.773549	41.4104	1.20816	0.358763	70.8279	2.49259	-0.430103	57.3658	97.6523	-0.40016	5.98072	0.0396728	0	4	14.8636	2.63033	0.128749	-0.343682	-0.848141	0
62.0469	743.202	0.0717125	58.7979	11.1577	-0.295826	62.6686	10.0629	-0.43666	61.4721	13.6944	-0.384481	0.00899149	0.00306372	0.0927473	2.38068	1.52924	0.201572	0.000199417	-0.371339	-0.809954	0
62.4585	13.6378	-0.123709	62.8558	0	-0.513044	58.7769	19.6452	-0.612222	51.1298	8.02995	-0.33779	0.000915213	0.000804647	0.10935	0.478161	0.815186	0.200057	0.000128488	-0.996772	-0.710665	0
24.3066	0	-0.0127445	58.9908	0.436085	-0.232742	61.719	0	-0.693582	59.8962	10.1618	-0.329507	0.000419057	0.000426904	0.24556	0.395599	0.0312412	0.967378	1.82278e-05	-1.03713	-0.432117	0
67.0208	4.02478	0.0155789	68.338	0.929277	-0.295529	62.8217	0	0.150768	53.0495	7.56578	-0.404147	0.547919	0.0126027	0.0684687	2.72212	8.53728	0.309527	0.0153212	-1.14983	-0.799977	0
62.8643	0	-0.123743	62.9194	1.30527	-0.301232	62.6998	19.9053	0.0834927	57.0703	0	-0.341724	0.0135164	0.00260539	0.0940463	1.43106	1.32658	0.243727	0.000392063	-1.07485	-0.712726	0
61.7683	0.188239	0.0969182	63.1224	31.5231	-0.290907	62.4042	2.25894	-0.600889	59.7427	6.76748	-0.404371	0.0195203	0.00424699	0.0971865	3.63684	1.19919	0.219726	0.000524922	-0.969102	-0.820894	0
27.0659	0.126543	0.0131182	59.0304	0.0156687	-0.293701	60.3096	3.14776	-0.428262	54.4703	0.0833481	-0.35217	0.000368915	0.000384844	0.21185	0.35596	0.000773994	1.96954	1.11385e-05	-1.19917	-0.501554	0
63.2956	11.1047	0.0716719	57.849	663.88	-0.197098	62.3603	0	-0.420443	55.7823	5.83952	-0.350476	0.0170611	0.00408965	0.0933342	3.41081	1.29086	0.195734	0.000258943	-0.339783	-0.816904	0
22.7817	38.6175	-0.797763	58.9224	746.53	-0.219876	51.8439	391.828	-0.120051	53.1031	5.76769	-0.40124	7.02779	0.0460834	0.0426049	3.99993	34.4137	2.38013	0.110331	-0.280488	-0.818482	0
63.9157	13.3408	0.0726382	62.922	1.01874	-0.477503	58.6139	0.0273814	0.113659	55.6558	13.3009	-0.400886	0.318814	0.0110945	0.0886903	3.42173	4.5107	0.308422	0.00534691	-1.08403	-0.815872	0
24.2636	747.306	-0.791173	25.6145	5.41848	-0.437648	52.9047	403.699	-0.466244	59.8144	818.649	-0.473123	28.7316	0.114812	0.372158	3.99316	5.53486	2.32066	0.0921361	-0.14337	-0.970257	0
25.1441	1.53912	-0.13965	64.9436	0.0701516	-0.291027	62.7432	0	-0.432214	56.0766	11.3206	-0.342672	0.000416476	0.00038108	0.219959	0.259465	0.0351834	0.360416	8.62167e-05	-0.99265	-0.239005	0
27.0947	0	0.109575	58.991	1.2866	-0.57446	66.7275	3.15757	-0.428929	50.0322	0.0813681	-0.454888	0.000432311	0.00044811	0.208817	0.422829	0.00241642	1.5752	8.01162e-06	-1.20981	-0.596549	0
68.0433	4.05209	0.0719976	62.6682	0.00511918	-0.476299	58.3082	0.00195395	0.113659	48.5893	13.3084	-0.401023	1.3513	0.022861	0.0752018	3.99857	9.37543	2.07759	0.0197305	1.14161	-0.828127	0
61.0052	11.8062	-0.0151873	62.7288	614.563	-0.467096	54.8143	3.40806	-0.430135	56.8188	882.651	-0.445897	0.00139521	0.00110175	0.10151	0.808581	1.05214	0.183632	8.20482e-05	-0.252262	-0.76226	0
22.013	778.118	-0.793006	51.7643	718.037	-0.283474	62.5408	378.995	-0.520383	52.7886	23.164	-0.447623	21.5293	0.0961311	0.186809	3.99254	11.347	2.82173	0.0805129	-0.117925	-0.991428	0
63.185	1.57082	0.0391759	57.6112	0	-0.291714	62.7089	1.09407	-0.428929	54.455	0.219302	-0.336546	0.00508714	0.00230275	0.0963016	1.72451	0.962869	0.201373	2.34346e-05	-1.24886	-0.801554	0
62.4561	10.5292	-0.123709	56.4628	689.223	-0.513044	59.3485	0.0724072	-0.600339	51.1298	8.02692	-0.337802	0.00104637	0.000861706	0.109576	0.547451	1.00262	0.201704	8.36893e-05	-0.256742	-0.7105	0
24.2502	24.4328	-0.798522	69.2462	36.3767	-0.536281	63.5543	23.6496	-0.570693	56.0576	2.88544	-0.326668	4.50372	0.0352199	2.72707	3.99462	0.232061	3.66602	0.138468	-0.578334	-0.845353	0
27.0875	0.277527	0.0913863	58.472	13.2231	-0.292881	62.4338	1.93933	-0.428304	59.9263	0	-0.341371	0.000369177	0.000416418	0.214374	0.426512	0.00223328	1.36356	3.62837e-05	-1.12437	-0.580386	0
26.9188	0	0.0131182	63.0225	6.81469	-0.271652	60.3096	388.172	-0.499696	57.0542	7.73795	-0.403279	0.00039793	0.000481368	0.204104	0.48964	0.0410826	0.638955	2.7313e-05	-0.312838	-0.499675	0
27.0987	0.00548985	0.079302	62.983	1.2866	-0.293701	62.4038	0.00981648	-0.500362	57.0389	0	-0.403288	0.000374593	0.000396116	0.213516	0.415201	0.00154478	2.64389	2.8694e-06	-1.23399	-0.569405	0
26.9776	0	-0.142398	58.9901	36.2533	-0.293701	61.8172	0	-0.427686	57.096	35.612	-0.341843	0.000433153	0.000478813	0.207972	0.276128	0.0682177	0.309718	8.30623e-05	-0.788691	-0.276517	0
