# Supplementary material for: Optimal tuning of multi-PID controller using improved CMOCSO algorithm
Source: PeerJ Comput Sci. 2024 Nov 19;10:e2453. doi: 10.7717/peerj-cs.2453 (PMC11622856; doi:10.7717/peerj-cs.2453)
Supplement: Supplemental Information 3 [file peerj-cs-10-2453-s003.xlsx]

## Sheet: Sheet1
P	I	D	P	I	D	P	I	D	P	I	D	ITSE	se	tr	ts	td	overshoot	ess	f_less	f_greater
75.1592	112.598	-0.162279	44.7553	37.5249	-0.231153	38.1217	50.6946	-0.359807	60.5043	98.3019	-0.275828	0.00212541	0.0015136	0.108043	1.08248	1.02303	0.178369	0.000291504	-1.57439	-1.69074	0
72.9307	3.74363	-0.305625	40.9956	97.372	-0.256031	37.9409	51.9342	-0.193986	47.8909	91.2914	-0.182331	0.00103317	0.00106058	0.121731	0.601802	0.689863	0.182104	0.000168251	-1.41244	-1.68542	0
73.4445	1.58366	-0.207063	44.8989	80.6971	-0.211511	41.6639	50.9916	-0.19832	40.4417	97.8786	-0.0945063	0.00131149	0.00122325	0.106123	0.822349	0.773994	0.180979	0.000157884	-1.43093	-1.72687	0
63.1025	2.88163	-0.394162	31.9909	53.8593	-0.237227	32.2647	50.6296	-0.132602	33.1988	105.858	-0.0923516	0.00134205	0.00127144	0.157906	0.730667	0.370841	0.200494	0.000194772	-1.31048	-1.62118	0
73.1503	5.45946	-0.398345	61.2795	93.6483	-0.214585	35.6551	27.6993	-0.133078	55.9166	76.9524	-0.0954317	0.000836033	0.000906714	0.11586	0.455958	0.697413	0.164624	0.000184131	-1.50508	-1.62038	0
67.2044	8.53528	-0.384663	44.2478	37.0588	-0.21463	41.5404	27.9133	-0.150467	40.5995	100.815	-0.0923516	0.000864046	0.00092616	0.12616	0.465058	0.516457	0.189579	0.000202996	-1.33148	-1.64596	0
73.3194	169.815	-0.136936	28.8395	35.3636	-0.21473	37.8488	53.0983	-0.290584	34.6357	96.9438	-0.0944719	0.0021078	0.00156166	0.152338	1.37189	0.748269	0.222915	0.000281676	-1.28274	-1.74244	0
65.7728	6.7305	-0.102585	39.0136	19.5003	-0.116002	37.6831	23.7309	-0.137669	31.1127	12.8464	-0.0916108	0.00131581	0.00118397	0.155314	0.655333	0.494229	0.242263	0.000223671	-1.80351	-1.79971	0
74.8547	100.387	-0.306826	39.1624	21.7211	-0.258882	37.8706	25.4002	-0.14521	31.1127	12.8464	-0.0916108	0.0010651	0.000992174	0.147804	0.445512	0.54699	0.205339	0.000322477	-1.8633	-1.69105	0
73.1311	1.95433	-0.310814	38.9965	21.6691	-0.258278	41.5169	24.4265	-0.198153	31.2653	12.8464	-0.0915468	0.000977735	0.000938534	0.138992	0.355243	0.512314	0.206982	0.000188093	-1.94826	-1.70514	0
70.0815	5.55212	-0.386465	39.0902	31.9142	-0.255435	37.8706	25.3023	-0.150682	30.912	15.3065	-0.186977	0.00106869	0.000993231	0.14356	0.305921	0.459809	0.191829	0.000232155	-1.71238	-1.65393	0
73.1311	1.93534	-0.386876	38.9966	8.8998	0.0884937	41.5169	24.4265	-0.208755	31.2653	15.2216	-0.185101	0.000947342	0.000902678	0.130176	0.369028	0.48648	0.18763	0.00016895	-1.55258	-1.21446	0
47.4067	3.45087	-0.0856295	39.2602	22.3863	-0.211014	38.892	88.7048	-0.137396	32.758	0.0166848	-0.181319	0.000776469	0.000848962	0.168781	0.486268	0.220357	0.269079	0.000144041	-1.42269	-1.75624	0
47.308	118.149	-0.0287966	45.2938	147.542	-0.214209	38.6653	49.5807	-0.183771	31.4553	75.3079	-0.184516	0.00100104	0.00108818	0.159248	1.48292	0.420394	0.245955	0.000261313	-1.30647	-1.74554	0
47.4067	117.497	-0.0837134	59.3728	35.549	-0.2556	37.5623	16.9001	0.178746	57.1784	96.6687	-0.182029	0.000721007	0.000833015	0.133005	1.05613	0.535152	0.224304	0.000261904	-1.22917	-1.6639	0
24.0808	3.78381	0.38058	40.9917	96.1241	-0.171106	37.6735	51.9342	-0.260367	47.9066	91.2914	-0.0973855	0.00149774	0.00127272	0.206734	1.04026	0.189096	0.602229	0.000316645	-1.22838	-1.90557	0
72.9307	2.13883	-0.305625	40.9956	20.6434	-0.163618	37.9418	25.5327	-0.193986	32.5193	39.9635	-0.184372	0.0010315	0.0010109	0.14359	0.395138	0.500351	0.20651	0.000210812	-1.50984	-1.67292	0
46.4587	0	-0.0290493	52.0342	19.5003	-0.254419	38.6834	25.2436	-0.184459	32.9689	73.9426	-0.0913856	0.000760813	0.000898644	0.160245	0.599893	0.255894	0.267181	0.000152943	-1.28731	-1.78525	0
62.243	6.68119	-0.388091	39.0085	19.9875	-0.255823	41.4637	15.157	-0.148077	31.018	0	-0.0918826	0.000940568	0.000814245	0.149212	0.263743	0.372254	0.233068	0.000144309	-1.75407	-1.56223	0
47.7269	0.867113	-0.0799584	45.2938	21.0304	-0.204469	41.5733	51.0143	-0.345548	40.7034	12.8342	-0.0973047	0.00068655	0.000816827	0.158643	0.355688	0.28854	0.228326	0.000159884	-1.49496	-1.72481	0
62.5542	73.3792	-0.102871	38.9833	20.7558	-0.115383	37.6154	24.2293	-0.137669	56.4338	17.473	-0.264929	0.00106167	0.00103445	0.136842	0.659812	0.585893	0.22197	0.000320153	-1.67749	-1.73675	0
47.0438	11.2491	-0.0286904	45.4614	96.9314	-0.213903	38.2583	50.4773	-0.183771	31.1845	70.6247	-0.184516	0.000913126	0.00105735	0.161461	0.726839	0.280691	0.268987	0.000279063	-1.33963	-1.79612	0
62.6098	116.483	-0.102585	39.0136	75.7647	-0.214392	37.6831	23.7309	-0.131416	30.9988	0	-0.189408	0.00115333	0.00106576	0.157535	0.879677	0.482739	0.243538	0.000251261	-1.36914	-1.76554	0
47.7269	117.824	-0.0656263	43.0093	21.1762	-0.21388	38.5174	87.6928	-0.145722	40.551	12.2759	-0.184516	0.000784539	0.000873501	0.16379	1.07763	0.357309	0.264442	0.000261894	-1.39399	-1.745	0
65.9781	1.49618	-0.208555	43.0439	80.6971	-0.123483	37.6958	39.3575	-0.19832	39.7035	96.5055	-0.0945958	0.000978331	0.00106088	0.143662	0.649214	0.516517	0.184752	0.00016885	-1.41995	-1.58626	0
47.7269	8.0579	-0.0665321	42.99	21.1612	-0.21388	38.5174	87.6928	-0.145722	40.5505	12.2094	-0.184516	0.00070627	0.000845576	0.161658	0.53499	0.243525	0.270702	0.000219565	-1.45303	-1.62952	0
63.037	0.867113	-0.0799584	45.2719	21.0304	-0.200832	41.3031	28.6816	-0.342234	41.9195	12.9928	-0.0973042	0.00118566	0.00109623	0.135938	0.628579	0.635069	0.202026	0.000151398	-1.76855	-1.619	0
73.069	4.80828	-0.310814	39.1732	21.6691	-0.258278	41.4125	24.4265	-0.197219	41.8086	12.8464	-0.0915468	0.000911126	0.000889423	0.118348	0.378301	0.594335	0.184311	0.00017773	-1.91047	-1.52152	0
63.4353	8.92005	-0.371514	36.4627	0.421297	-0.0149449	37.8702	25.3023	-0.137626	31.1096	14.6057	-0.0930902	0.000879302	0.000830135	0.155932	0.272794	0.251544	0.211921	0.000190688	-1.76786	-1.49665	0
51.9683	116.483	-0.0991118	39.5922	75.7647	-0.226216	37.6831	23.7309	-0.13263	33.0727	0	-0.0849452	0.000875434	0.000905128	0.158725	0.904231	0.345876	0.266398	0.000250178	-1.50254	-1.59981	0
73.1368	116.497	-0.282489	39.1132	21.699	-0.258278	37.8706	6.04574	-0.142035	31.1131	12.9128	-0.0916097	0.00103637	0.000947585	0.148184	0.463544	0.535854	0.205122	0.000275941	-1.75655	-1.52012	0
44.5953	2.74444	-0.0898949	39.2602	22.2765	-0.211374	38.892	17.1413	-0.137483	32.161	0	-0.181319	0.000712732	0.000756423	0.174489	0.335411	0.151197	0.268362	0.000148464	-1.95874	-1.60772	0
62.4828	6.7305	-0.10148	38.727	19.5003	-0.198371	43.5059	23.7309	-0.137669	30.9988	0	-0.0377362	0.00104964	0.00099744	0.155976	0.572461	0.441164	0.203106	0.000153024	-1.83774	-0.994734	0
46.3004	0.867113	-0.0799582	45.2938	20.2307	-0.204469	41.5733	51.0143	-0.345548	40.7034	12.8342	-0.0972899	0.000671035	0.000803774	0.160266	0.347162	0.260761	0.249801	0.000159759	-0.861396	-1.29451	0
44.5953	2.77256	-0.0898949	39.2602	16.2471	-0.211374	38.8965	17.1413	-0.13998	32.1701	0	-0.161044	0.000698754	0.000738893	0.175585	0.310895	0.141762	0.265964	0.000139287	-1.22782	-1.30296	0
44.5953	2.77063	-0.0915545	39.2103	16.7683	-0.211374	39.3954	8.59269	-0.132595	32.1701	0	-0.158611	0.0006857	0.000713063	0.174725	0.310914	0.140889	0.268192	0.000120117	-1.95216	-0.896966	0
63.442	2.77256	-0.177403	39.2602	16.2471	-0.231434	38.9361	17.1266	-0.13998	31.1309	0.901395	-0.161044	0.000896111	0.000866505	0.156202	0.408336	0.366851	0.204537	0.000127293	-1.92059	-0.771368	0
72.2912	0.867113	-0.0799477	45.0067	20.5383	-0.200842	36.2874	6.30715	-0.345548	40.7034	12.8342	-0.0972897	0.003607	0.00192578	0.119408	1.22612	0.886343	0.20026	0.000116479	-1.64277	-1.66137	0
75.1264	0.174262	-0.079948	45.0067	6.05979	-0.204469	36.2696	6.30715	-0.298701	40.7034	11.5585	-0.182113	0.00662912	0.00261248	0.119748	1.77988	0.882962	0.197308	6.06994e-05	-1.72625	-1.66099	0
65.8834	2.29568	-0.145363	42.8968	83.7767	-0.123483	37.2518	39.3575	-0.133544	39.7035	96.5055	-0.09726	0.00116983	0.00117516	0.139306	0.799344	0.581882	0.180711	0.000172554	-1.24507	-1.68903	0
62.4828	6.88439	-0.10148	38.727	19.5003	-0.202087	43.5059	23.7309	-0.215068	30.9988	0	-0.0377362	0.00102392	0.000978362	0.155833	0.534447	0.4502	0.224416	0.000153627	-1.6902	-1.70334	0
46.4587	0	-0.0290493	52.0154	19.5003	-0.254419	38.6834	25.2436	-0.188272	32.9689	14.1513	-0.182158	0.000703247	0.000811439	0.163178	0.401858	0.236102	0.244259	0.000160058	-1.62389	-1.70932	0
44.5953	0.856003	-0.0900475	45.6787	16.4362	-0.211374	38.8965	28.2451	-0.13998	32.2886	0	-0.0981518	0.000651908	0.000726227	0.167588	0.314152	0.143823	0.290719	0.000117102	-1.60171	-1.67385	0
23.309	3.73617	0.316899	39.2367	26.5999	-0.255707	38.4832	24.1794	-0.191606	47.5384	23.5457	-0.182261	0.00079339	0.000857172	0.260809	0.677582	0.0191468	0.906333	0.000342524	-1.59652	-1.86772	0
44.5953	2.77063	-0.0915728	39.2103	16.7683	-0.211387	41.5431	8.59269	-0.132595	32.0589	0	-0.158611	0.000674534	0.000705144	0.174395	0.311004	0.146108	0.268536	0.000117219	-1.8429	-1.67417	0
75.1264	0.158804	-0.079948	45.0067	6.05979	-0.204469	36.2696	6.30715	-0.298701	34.7984	11.5585	-0.182113	0.00626167	0.00253814	0.134185	1.69672	0.833148	0.223578	7.50965e-05	-1.63688	-1.65246	0
62.8998	2.78119	-0.393902	36.1917	37.0081	0.0831876	38.8596	17.2127	-0.138687	31.1373	13.1694	-0.158258	0.00094257	0.000921927	0.154468	0.330726	0.289008	0.210238	0.000211238	-1.3842	-1.52836	0
46.4587	0	-0.0290493	52.0819	19.5337	-0.254419	38.6788	52.2184	-0.181962	54.9081	105.357	-0.0913856	0.00071142	0.000872165	0.143905	0.534214	0.373517	0.224022	0.000139972	-1.39304	-1.63643	0
24.2352	3.73617	0.315811	40.9917	16.7617	-0.211312	38.9	49.2183	-0.191631	48.1109	0	-0.182331	0.000825399	0.000858443	0.251721	0.69504	0.0328151	0.776747	0.000273464	-1.38986	-1.86872	0
65.7728	6.7305	-0.0966889	39.0136	19.5003	-0.123628	37.6831	23.7309	-0.137669	31.3349	13.3853	-0.0916108	0.00135915	0.00120644	0.155328	0.708859	0.491054	0.220229	0.00022452	-1.56729	-1.70418	0
63.1025	6.62481	-0.450762	36.3676	53.8593	0.0264883	32.2647	50.6296	-0.132602	33.1415	105.858	-0.0920977	0.00121094	0.00117629	0.151778	0.697602	0.374441	0.205528	0.000213849	-1.03608	-1.45588	0
48.4986	164.334	-0.058928	42.9672	88.6792	-0.214317	37.8763	87.1387	-0.194205	40.4983	12.2759	-0.184586	0.000870575	0.00096742	0.157949	1.37432	0.430471	0.241066	0.000192314	-1.27868	-1.67438	0
44.5839	2.74444	-0.0898949	60.4118	22.2765	-0.254586	38.892	17.1413	-0.129704	57.7254	0	-0.182038	0.000499331	0.000617638	0.161501	0.380959	0.286936	0.222103	0.0001198	-1.53988	-1.44965	0
76.5208	0.174262	-0.0844264	45.0057	6.14514	-0.204609	41.5535	7.50416	-0.298701	40.7034	11.5585	-0.182113	0.00960319	0.00314238	0.108532	2.30251	0.974771	0.200108	5.34219e-05	-1.66045	-1.49649	0
70.0876	0.174262	-0.0825729	45.0067	2.93445	-0.204469	41.5591	27.0628	-0.298701	40.7803	17.9047	-0.182113	0.0022064	0.00151192	0.131444	0.98326	0.736138	0.174638	0.000118155	-1.46541	-1.54217	0
44.5953	2.74444	-0.0896849	40.5776	24.1599	-0.211374	37.8414	16.7395	-0.0393005	32.4908	0	-0.182294	0.000696867	0.000754035	0.172943	0.321557	0.148311	0.270104	0.00014953	-1.65524	-1.49789	0
63.3023	8.83057	-0.371514	37.3295	0.421297	-0.0181248	37.8706	9.07852	-0.150841	31.1121	14.6254	-0.0930902	0.000856836	0.000783124	0.158954	0.265752	0.258111	0.227901	0.000160442	-1.56203	-1.39338	0
63.5148	2.77256	-0.177403	39.2602	16.2471	-0.231434	37.8627	17.1266	-0.13998	35.3602	0.901395	-0.161044	0.000862422	0.00085798	0.155177	0.404494	0.367322	0.204897	0.000128325	-1.71336	-1.52647	0
24.0808	2.41682	0.336836	44.8457	146.043	-0.256144	41.5063	49.1061	-0.191631	47.4858	91.2914	-0.179005	0.000961111	0.0010129	0.20625	0.869	0.0865466	0.646938	0.000239034	-1.08534	-1.68133	0
45.9771	0.174262	-0.079948	45.0193	6.05979	-0.204469	37.693	6.38105	-0.297555	40.7034	11.5585	-0.182113	0.000640896	0.000691191	0.163883	0.320594	0.202308	0.241496	8.53136e-05	-1.85558	-1.50959	0
62.4828	6.88439	-0.10148	38.727	18.8806	-0.202087	43.5059	25.2673	-0.0892999	30.9988	0	-0.0377362	0.00108404	0.00101655	0.140358	0.572492	0.459698	0.200369	0.000154407	-1.61214	-1.55469	0
62.4828	6.7305	-0.10148	39.0192	19.5003	-0.199917	43.5606	23.7309	-0.137669	31.0007	0.197633	-0.0918991	0.0010412	0.000989873	0.156182	0.563747	0.441939	0.201638	0.000153371	-1.20587	-1.70428	0
76.5035	0.174262	-0.0799477	45.0067	16.6044	-0.204469	36.2598	7.29897	-0.29868	40.7034	11.5738	-0.182327	0.0109131	0.00333016	0.116727	2.41189	0.958153	0.198806	4.83231e-05	-1.26317	-1.59996	0
46.4587	1.57097	-0.0290493	52.0819	75.6087	-0.211016	38.6108	51.0528	-0.18175	55.7511	105.357	-0.0913856	0.000744407	0.000925439	0.142107	0.554719	0.394308	0.219632	0.000172005	-0.915358	-1.61887	0
63.442	2.77256	-0.173582	39.2602	16.2471	-0.211209	38.9361	17.1266	-0.13998	32.1686	0.00258778	-0.161044	0.000884505	0.000861182	0.158875	0.414526	0.359882	0.202308	0.000121064	-1.27676	-1.68089	0
64.0276	7.62687	-0.36685	36.9487	18.6333	-0.0367247	37.9336	7.54894	-0.135778	40.7034	14.7817	-0.106726	0.000773694	0.000777049	0.149945	0.286537	0.325177	0.187746	0.000181953	-1.60277	-1.03749	0
75.1264	0.174262	-0.079948	42.0591	0.719693	-0.204469	36.2603	2.51468	-0.298702	40.7034	47.6338	-0.182113	0.00636733	0.00255556	0.122537	1.77704	0.878172	0.20099	7.25816e-05	-1.26492	-1.18049	0
44.5736	0.867113	-0.089631	48.1833	16.3798	-0.200832	41.3031	28.2477	-0.137103	32.9066	13.0928	-0.216055	0.000664468	0.000772427	0.166653	0.355948	0.182054	0.248344	0.000167007	-1.59297	-1.10473	0
44.5737	2.77256	-0.0898949	39.2602	18.2807	-0.201322	38.8254	17.1413	-0.13998	32.6959	0	-0.161044	0.000693082	0.00074001	0.174679	0.320342	0.141691	0.266443	0.000143422	-1.79479	-1.10896	0
75.1264	0.174262	-0.0799477	45.0067	6.0633	-0.204469	36.2691	6.32249	-0.298679	40.7034	11.5585	-0.182113	0.00658434	0.00260489	0.118656	1.75702	0.880865	0.197319	6.07707e-05	-1.69594	-1.18564	0
43.4411	0.147275	0.0143599	45.0067	6.0633	-0.204469	36.2691	6.32249	-0.298679	40.6364	11.5585	-0.182113	0.000658959	0.000721218	0.16543	0.374697	0.188254	0.266684	8.72462e-05	-1.95351	-1.05356	0
62.4192	2.76355	-0.177403	40.9557	16.2471	-0.233182	37.8713	17.1266	-0.13998	35.3602	0.901395	-0.0969736	0.000822136	0.000833636	0.155484	0.390546	0.350204	0.201723	0.000125577	-1.79373	-1.00375	0
44.5953	2.77057	-0.0779917	39.2103	16.7683	-0.211387	38.8822	17.7489	-0.132595	32.0589	0	-0.158249	0.00069829	0.000743762	0.175452	0.309473	0.144021	0.267259	0.000141927	-1.82975	-0.950695	0
44.3611	8.39064	-0.0799587	47.1825	6.14926	-0.174077	41.223	6.36181	-0.193906	41.9396	11.5087	-0.217715	0.000560295	0.000636688	0.166795	0.325605	0.169494	0.26959	0.000176376	-1.39138	-1.0872	0
25.9723	2.85249	0.336836	42.2117	146.043	-0.256144	41.645	49.1061	-0.191631	40.8027	12.2408	-0.135619	0.00106196	0.0010476	0.228499	0.881524	0.114176	0.53875	0.000231873	-0.623908	-1.25093	0
44.0533	91.8217	-0.0290493	52.0819	75.6087	-0.265856	39.1942	86.3527	-0.209448	54.6896	12.1928	-0.182411	0.000709491	0.000834085	0.161062	1.14102	0.379732	0.221644	0.000287416	-0.740124	-1.09669	0
44.0533	93.1016	-0.0290493	52.0819	75.6087	-0.265856	41.5697	88.269	-0.209448	54.6896	17.887	-0.182126	0.000688571	0.0008247	0.160954	1.13141	0.381169	0.221519	0.000291856	-1.25061	-1.09807	0
72.2912	0.644718	-0.360398	36.8811	2.25504	-0.195437	37.8146	6.30715	-0.139189	40.7034	12.8342	-0.0972815	0.000838353	0.000760215	0.137177	0.336946	0.468116	0.184787	8.18637e-05	-1.86176	-1.05777	0
47.8198	0.414745	-0.0665752	45.2945	6.3618	-0.204469	38.5464	112.596	-0.296077	34.9541	11.5114	-0.184598	0.000770875	0.000863614	0.159991	0.565184	0.274452	0.24609	0.000103087	-1.21108	-1.10224	0
23.345	3.60605	0.325918	51.8607	47.7464	-0.201053	39.1779	40.9385	-0.0228286	53.7559	12.1095	-0.182429	0.000991295	0.000977324	0.208758	0.741966	0.0694547	0.539937	0.00030976	-1.44587	-1.23169	0
73.3915	0	-0.079948	45.0067	6.05979	-0.184961	36.3264	6.30715	-0.298701	40.7034	11.5585	-0.182113	0.00425428	0.00208958	0.11945	1.37153	0.839947	0.198152	7.31121e-05	-1.73983	-1.18978	0
62.3908	6.91982	-0.0852973	37.0609	19.0272	-0.202087	43.5059	25.2673	-0.0892999	30.9988	0	-0.181442	0.00116022	0.00105621	0.140667	0.561451	0.4549	0.221509	0.000158832	-1.65128	-1.17662	0
44.5736	0.869114	-0.0301858	48.1833	16.3798	-0.253296	37.7994	25.299	-0.137103	32.9088	13.0897	-0.216055	0.000698393	0.00080362	0.16696	0.363662	0.180834	0.248416	0.000171758	-1.62602	-0.76999	0
47.4114	11.1699	-0.0286904	45.4614	96.9314	-0.213903	38.9291	50.72	-0.183771	31.1845	0	-0.184516	0.000807849	0.000890365	0.165808	0.501145	0.247367	0.248287	0.000219981	-0.860687	-1.71207	0
25.3144	2.74444	-0.103945	40.9452	22.1962	-0.211374	38.892	16.2038	-0.137483	31.6507	0	-0.181319	0.000724997	0.000696853	0.267176	0.317075	0.0164337	0.462494	0.000216456	-1.08122	-1.3651	0
44.5953	2.77063	-0.0915728	51.9563	19.4247	-0.211387	41.5431	8.64474	-0.132595	32.0589	0	-0.158611	0.000607865	0.000656057	0.168042	0.326021	0.175809	0.247284	0.000101737	-1.28237	-1.63543	0
26.9568	3.73617	0.301081	40.9917	16.8655	-0.2045	39.4342	8.18001	-0.192613	48.3256	90.4656	-0.181066	0.000878628	0.000921534	0.224447	0.749897	0.0828063	0.584838	0.000251524	-0.837295	-1.83378	0
43.4411	0.147275	0.0194948	45.1468	6.0633	-0.204469	44.5565	6.32249	-0.298679	31.6734	0	-0.181916	0.000661661	0.000686963	0.167403	0.355423	0.163772	0.288772	4.05781e-05	-1.49777	-1.7406	0
43.7542	91.8217	-0.0290493	52.0819	75.6087	-0.296349	39.1942	45.1997	-0.209448	54.0288	66.3467	-0.180901	0.000711165	0.000852017	0.159223	1.13664	0.36887	0.221823	0.000334907	-0.791581	-1.64166	0
43.4411	2.84855	0.00709774	45.0054	15.3951	-0.23683	36.2691	6.32249	-0.298679	40.6364	12.1207	-0.182113	0.000660978	0.000737061	0.164329	0.373934	0.189399	0.26797	0.000146602	-1.35146	-1.7327	0
25.9442	0	-0.0290505	52.0819	76.7305	-0.265856	41.5697	51.2453	-0.208822	54.6896	17.6898	-0.182499	0.000504995	0.000643487	0.251671	0.327918	0.0233448	0.873075	0.000142813	-0.85244	-1.51131	0
62.243	6.68119	-0.388091	39.0085	19.9875	-0.201046	41.4637	15.157	-0.0894657	30.9988	0	-0.0918826	0.000883339	0.000786336	0.145291	0.256745	0.329372	0.23111	0.000144444	-1.09984	-1.51434	0
46.4587	0	-0.0290493	39.2694	16.8439	-0.254419	38.6834	25.1915	-0.188272	32.9689	14.4747	-0.182158	0.000763428	0.000856304	0.167034	0.362431	0.198201	0.264767	0.000176433	-1.14106	-1.71179	0
23.353	3.6097	0.325918	51.8607	17.0196	-0.201053	39.186	5.41285	-0.0228286	53.8151	12.1095	-0.182331	0.000945282	0.000889165	0.206724	0.782863	0.057771	0.561265	0.000241996	-1.85189	-1.1899	0
25.3144	2.74444	-0.103539	45.2793	22.1962	-0.211429	38.892	16.2038	-0.295702	35.0712	0	-0.181319	0.000677577	0.00065625	0.249685	0.303038	0.0231378	0.440734	0.000208267	-1.5514	-0.770073	0
46.4133	0	0.147698	39.5834	16.8913	-0.225742	37.6831	23.7309	-0.13263	33.0727	0	-0.0849452	0.00145877	0.00122086	0.158058	0.857973	0.393475	0.281608	0.000115255	-1.50291	-1.163	0
28.1379	1.92531	-0.0290505	51.9494	7.33822	-0.175247	41.5697	69.2468	-0.208755	54.6896	17.6898	-0.182474	0.000476925	0.000600333	0.224133	0.319505	0.025489	0.523255	0.000168556	-1.26199	-0.929245	0
26.9568	3.73617	0.269965	40.9917	16.8655	-0.2045	39.439	8.18001	-0.191784	40.4866	14.3637	-0.181066	0.000714126	0.000790695	0.253562	0.613228	0.0259803	0.714412	0.000250672	-1.74742	-1.18237	0
23.353	3.6097	0.325918	51.8607	47.7966	-0.201053	39.186	5.41285	-0.0228286	53.7579	12.1095	-0.182427	0.000955096	0.00091888	0.206569	0.761731	0.0618281	0.539975	0.000260047	-1.40665	-0.81135	0
43.7542	91.8217	-0.0290493	52.0819	43.3447	-0.423602	39.1942	45.1997	-0.209448	54.0288	66.3467	-0.180901	0.000725345	0.000846338	0.153445	1.05176	0.398213	0.227838	0.000337891	-0.850559	-0.676321	0
