# Supplementary material for: Optimal tuning of multi-PID controller using improved CMOCSO algorithm
Source: PeerJ Comput Sci. 2024 Nov 19;10:e2453. doi: 10.7717/peerj-cs.2453 (PMC11622856; doi:10.7717/peerj-cs.2453)
Supplement: Supplemental Information 4 [file peerj-cs-10-2453-s004.xlsx]

## Sheet: Sheet1
P	I	D	P	I	D	P	I	D	P	I	D	ITSE	se	tr	ts	td	overshoot	ess	Constraints
73.4692	660.703	-0.34595	77.5113	175.94	-0.101376	73.1036	291.975	-0.312118	80.2454	120.15	-0.539333	0.0033063	0.00164118	0.0906059	1.48041	2.00252	0.123375	9.08604e-05	-4.94658	-16.2936	-14.5008	-0.410686
70.5219	710.067	-0.20165	57.6302	213.551	0.0980448	75.8815	418.962	-0.176272	70.8101	300.656	-0.21334	0.00645735	0.00241405	0.0848935	1.52295	2.1962	0.202232	1.03293e-05	-7.06961	-17.866	-12.9811	-0.315701
36.6791	492.132	0.129982	74.3731	264.465	-0.342063	42.7243	489.823	0.0743347	59.3622	454.157	-0.07866	0.00132227	0.00104826	0.100813	0.97396	1.32454	0.264448	9.85389e-06	-9.00221	-17.0954	-5.85796	-0.579609
64.5487	16.0951	-0.331528	71.0288	299.62	-0.545838	35.1469	68.7017	-0.0822787	32.5077	428.258	0.0610015	0.00101684	0.00102817	0.140777	0.658781	0.74763	0.194506	0.000150059	-5.44135	-14.5833	-3.73988	-0.622358
70.5219	710.067	-0.155136	49.9627	213.551	0.0980448	39.6746	375.436	-0.176272	51.0175	798.506	-0.21334	0.00328835	0.00160655	0.0947486	1.12019	1.75574	0.197826	7.69697e-06	-9.37994	-18.4937	-6.62073	-0.394985
70.5219	710.067	-0.159079	49.9627	213.037	0.0980448	39.6746	375.436	0.26974	64.5604	824.721	-0.21334	0.00617648	0.00231761	0.0859654	1.36485	2.16106	0.218384	1.99734e-05	-8.0491	-18.4418	-8.82415	-0.28436
64.5487	16.0951	-0.394828	71.3959	307.183	-0.519664	35.1469	740.727	-0.0883857	30.6378	399.838	0.0880613	0.00116718	0.0010064	0.127148	0.570942	1.02434	0.197239	9.12619e-05	-4.90828	-13.451	-0.996788	-0.600467
73.255	397.714	-0.0797299	78.4079	30.5933	0.516393	37.1768	373.441	0.220897	65.0283	504.732	0.49346	1.34036	0.0241809	0.081507	3.02546	2.57139	0.413898	0.0139657	-5.33233	-19.8105	-7.76745	-0.125833
64.5487	34.3113	-0.394828	71.6181	283.515	-0.542196	51.3786	7.56914	-0.0883857	32.5077	428.258	0.0763777	0.000902199	0.000869148	0.116343	0.539588	0.85837	0.196898	0.000162861	-4.80299	-13.4583	-3.80161	-0.592215
70.6817	687.596	-0.159079	49.7609	894	0.0980448	81.7542	375.436	-0.732122	64.5604	806.713	-0.21334	0.00358445	0.00172016	0.0872958	1.08641	2.31228	0.159884	4.4538e-06	-4.59745	-18.4656	-5.53599	-0.253477
75.1001	737.277	-0.0830327	49.9446	67.6411	0.776186	64.4755	575.889	-0.0940015	79.8221	233.073	-0.542832	0.680095	0.0143509	0.0834866	2.7768	2.42861	0.286489	0.00940736	-5.3383	-20.0113	-13.285	-0.0762568
70.5219	710.067	-0.114892	49.4156	216.792	0.0980448	39.6746	416.028	0.26974	64.4363	824.721	-0.17761	0.0109423	0.00303301	0.083934	1.52559	2.52287	0.265013	1.39974e-05	-8.74169	-19.0105	-8.03245	-0.142775
64.5487	34.3113	-0.394828	71.6181	248.367	-0.530618	51.7909	0	-0.0883857	33.6302	17.5373	-0.615163	0.00243304	0.00129657	0.127861	0.550026	1.3186	0.187904	0.000213988	-4.93313	-13.4583	-25.3165	-0.339714
76.5821	739.865	-0.0777851	83.6	894	0.8	78.7727	74.1399	-0.686175	83.6	89.3912	-0.690747	0.702013	0.0137215	0.0839501	2.90844	2.66304	0.225008	0.00528035	-3.05552	-20.257	-14.0521	-0.115051
73.1167	774.963	-0.0779743	83.6	863.301	-0.38676	83.6	0	-0.8	83.6	0	-0.8	0.00724822	0.00252042	0.0900017	1.6083	2.64575	0.144445	5.07423e-06	-5.62128	-19.812	-12.8337	-0.218973
83.6	894	-0.147934	83.6	894	-0.376253	83.6	894	-0.594974	83.6	894	0.8	0.730301	0.0160175	0.0808317	3.81035	2.8124	0.174909	0.0106765	-2.37673	-20.3639	-13.7681	-0.0553482
75.1242	765.516	-0.0932072	81.7497	263.857	0.581438	59.1165	576.946	-0.0937967	71.679	35.1181	-0.544845	0.692297	0.0136693	0.0845628	2.40224	2.42023	0.221661	0.00596697	-4.28559	-19.8989	-11.648	-0.235708
81.0567	894	-0.115014	83.6	894	-0.376253	83.6	894	-0.594974	83.6	894	0.8	0.733951	0.0163266	0.0821792	3.98027	2.50825	0.246139	0.0142867	-2.58718	-20.4055	-13.3874	-0.100539
83.6	877.118	-0.359164	77.9764	168.171	-0.67969	77.7224	569.561	-0.333823	83.6	219.127	-0.792131	0.0022776	0.00142089	0.0918615	0.843066	2.8928	0.130181	3.86103e-05	-4.07824	-17.8738	-14.1455	-0.0599374
64.6591	867.256	-0.297074	83.6	841.868	-0.413702	80.6395	9.39478	-0.8	79.8427	0	-0.766384	0.00156768	0.00107437	0.101115	0.668204	2.45268	0.141345	9.4768e-06	-3.03409	-15.3592	-9.60983	-0.227105
83.6	682.711	-0.412769	79.3776	139.111	-0.38688	59.789	352.792	-0.138257	42.4433	382.741	-0.135767	0.0014653	0.00116541	0.0926454	0.913924	1.79559	0.137825	2.94318e-05	-5.72623	-17.1559	-9.62764	-0.392589
25.8345	9.48392	-0.169905	47.2243	8.55045	-0.139045	83.4712	11.2755	-0.8	80.5824	0	-0.735786	0.000479178	0.000430474	0.196588	0.299866	0.140252	0.297551	0.000315904	-1.22322	-5.01074	-49.4623	-0.939454
67.5932	445.199	-0.421517	49.1734	118.064	-0.0798689	22.2823	2.32946	0.0798689	55.875	1.67859	-0.0238382	0.00099529	0.000890508	0.126745	0.913855	0.718747	0.29283	6.945e-05	-6.97974	-13.9057	-17.0677	-0.751427
64.4889	17.1061	-0.223326	71.4733	68.0411	-0.543863	62.8571	400.201	-0.10339	48.7696	809.067	0.133047	0.00137826	0.00111598	0.0943458	0.776164	1.2213	0.163407	0.000127193	-7.04828	-16.4462	-4.04264	-0.560574
64.5487	58.9164	-0.229061	71.6181	283.515	-0.530618	51.2137	33.2249	-0.0868091	33.0536	428.258	0.0880613	0.000955508	0.000946824	0.101109	0.680236	0.917463	0.185003	0.000217607	-6.46318	-16.3661	-4.10891	-0.657585
82.6272	690.635	-0.170651	49.5004	420.9	0.0980448	81.6739	355.15	-0.732122	64.5604	806.713	-0.242542	0.0220873	0.00420832	0.084197	2.18637	2.88971	0.207566	4.6419e-05	-5.55539	-19.9916	-10.0118	-0.012885
70.6817	93.8233	-0.159079	48.0509	894	0.0980448	81.6844	371.231	-0.732122	64.5604	739.454	-0.21334	0.00310978	0.00161607	0.0899776	1.05308	1.88758	0.157193	0.000146494	-5.41971	-18.4557	-3.52644	-0.380673
82.8076	810.356	-0.469075	78.0724	0.902327	-0.764536	82.9034	593.376	-0.318431	76.6949	0.164039	-0.795721	0.00254674	0.00140763	0.0973957	0.72172	3.08595	0.134991	2.19899e-06	-4.05159	-16.3264	-14.767	-0.0606873
70.9788	7.79763	-0.0810361	59.6867	161.19	-0.1573	80.6673	564.869	-0.8	80.4446	14.4234	-0.521763	0.00434578	0.002035	0.0895857	1.36462	1.88485	0.162559	7.21186e-05	-5.14131	-19.4929	-16.5587	-0.266064
56.2158	366.335	-0.425631	81.9642	343.463	-0.153571	83.5339	633.536	-0.393433	73.5935	498.863	-0.461056	0.000987596	0.000899596	0.10874	1.25142	1.62909	0.1771	3.97529e-05	-1.50586	-11.4433	-15.2124	-0.485973
52.56	287.81	0.0811075	61.4509	122.211	-0.248809	80.0153	213.39	-0.179274	80.1523	169.758	-0.305306	0.0095737	0.00269054	0.0873067	1.66389	1.86228	0.244782	7.66549e-05	-9.78732	-18.9457	-16.5382	-0.172569
22.4679	9.48392	-0.169905	46.6106	8.55045	-0.139045	83.4712	11.2755	-0.8	80.5824	0	-0.735786	0.00053111	0.000404295	0.228372	0.308842	0.0711418	0.414235	0.000390022	-0.548098	-3.05085	-43.8542	-0.973564
30.9437	203.238	-0.0598368	48.9496	76.036	0.00578839	81.3575	175.392	-0.52342	80.1744	87.4347	-0.626085	0.000567946	0.000624643	0.154402	1.38844	0.508242	0.315317	0.000106274	-3.50591	-11.5794	-9.83605	-0.852776
80.5672	500.758	-0.701024	83.3423	6.18587	-0.635181	23.0277	0.00726124	-0.257484	22.2244	0	-0.0153325	0.00271749	0.00124703	0.141502	0.600911	1.6037	0.285304	1.11921e-05	-2.28097	-14.9358	-19.7604	-0.0846198
82.9351	777.068	-0.428959	59.7343	161.612	-0.0260548	43.7763	3.90776	0.195262	82.8134	813.575	-0.456781	0.00180325	0.00131314	0.0880596	1.015	2.11044	0.138566	2.44086e-05	-4.07258	-16.85	-14.5878	-0.131379
83.5168	2.57466	-0.428796	78.0191	162.866	-0.575825	83.1644	834.702	-0.507447	83.6	0	-0.751061	0.001334	0.00100945	0.0951495	0.481833	2.25265	0.124205	3.41421e-05	-4.73175	-16.8205	-12.8044	-0.277434
74.6684	894	-0.069651	55.124	0	0.8	82.9695	612.16	-0.779813	77.1021	92.0668	-0.311957	0.683002	0.0139528	0.0822624	2.72667	3.05945	0.245457	0.00406433	-4.41869	-20.1067	-11.8463	-0.0510649
65.5208	7.6429	-0.310165	83.3696	306.3	-0.144071	83.6	639.036	-0.383039	65.7047	894	-0.0592998	0.00436578	0.00179055	0.092471	1.50934	1.45396	0.161679	0.00013088	-4.96349	-15.1785	-7.42763	-0.533158
22.4679	9.48392	-0.0752337	46.6106	8.55045	-0.139045	83.4712	11.2755	-0.8	81.3263	0	-0.735786	0.000462504	0.000396777	0.233663	0.35239	0.0229225	0.617372	0.000391514	-2.59343	-7.40824	-43.9082	-0.988291
64.3675	14.8618	-0.105701	71.2608	0	-0.32818	83.6	831.223	-0.710104	83.5152	717.101	-0.750951	0.00142079	0.00110838	0.0931147	0.761385	1.75054	0.166342	8.12633e-05	-4.49684	-18.2037	-12.4123	-0.348656
83.5176	2.57466	-0.207305	78.7575	709.651	0.578729	83.1614	691.883	-0.413161	61.9685	715.668	-0.153268	0.689347	0.0135412	0.0835359	2.26761	2.08565	0.219561	0.0111818	-4.48752	-19.6826	-9.01051	-0.287782
83.6	0	-0.412163	81.981	12.4728	-0.640159	58.0697	0.00726124	-0.266411	63.0825	694.389	-0.18844	0.00115451	0.000920068	0.0941817	0.534678	1.5916	0.124679	1.16557e-05	-5.79335	-17.067	-9.60107	-0.413309
83.5203	2.55627	-0.436322	78.2042	184.608	-0.542756	81.339	48.9866	-0.464091	81.5573	0.0873536	-0.699626	0.0011865	0.00096876	0.094887	0.466601	2.02507	0.127647	5.95713e-05	-5.37729	-16.7159	-33.4616	-0.368409
70.5219	5.14361	-0.58522	49.4156	216.702	0.0980448	39.6746	416.028	0.26974	64.5493	825.897	-0.17761	0.000938151	0.000891519	0.105528	0.85969	1.07165	0.218602	3.79375e-05	-4.19753	-12.8877	-6.68038	-0.55724
75.145	11.9973	-0.104089	64.4476	161.19	-0.377559	41.755	569.425	0.191382	83.6	0	-0.456781	0.0156009	0.00352377	0.0854951	1.88656	2.04159	0.219203	7.40204e-05	-8.65988	-19.7767	-5.00823	-0.119592
83.5882	15.2854	-0.498698	59.0057	894	-0.0306603	83.6	570.335	-0.424289	81.0211	843.042	-0.555587	0.00124995	0.00099143	0.0925059	0.609849	2.21444	0.124644	5.24009e-05	-4.06183	-15.8644	-6.28361	-0.223473
80.022	821.138	-0.452257	76.0098	581.683	-0.280821	81.1788	836.654	-0.199349	81.3895	753.21	-0.167966	0.00276115	0.00162168	0.0869905	1.23454	2.77399	0.119267	1.39982e-06	-3.8093	-16.0535	-13.9301	-0.174026
22	0	0.169908	83.6	226.646	-0.8	82.3345	638.218	-0.8	82.9439	0	-0.8	0.000535735	0.000590225	0.170934	0.557621	0.0501395	1.74032	1.71149e-05	-5.38476	-14.8998	-11.4265	-0.959539
34.6644	36.4069	0.0601761	82.0029	277.294	-0.65348	79.3329	619.697	-0.490853	77.693	39.3577	-0.523381	0.000476398	0.000589564	0.128242	0.672167	0.226862	0.229494	0.000350659	-6.28327	-15.4707	-13.6139	-0.904129
80.3391	894	-0.321486	79.6875	845.63	0.559067	72.8424	861.702	-0.395106	66.0435	720.185	-0.0761179	0.683927	0.0123472	0.0862335	1.71607	2.3463	0.20112	0.00945784	-2.80597	-17.845	-11.5635	-0.241597
28.9176	50.3075	0.208629	82.4696	427.054	-0.8	82.9142	715.422	-0.762524	83.6	0	-0.744241	0.000734678	0.000695353	0.128326	1.30687	0.433231	0.235377	0.000321427	-5.68561	-17.0287	-12.338	-0.806851
24.6137	38.0342	0.150752	82.4162	266.177	-0.733906	83.5976	734.269	-0.755866	83.6	43.0357	-0.789849	0.000624521	0.000600484	0.159501	1.38328	0.144716	0.576436	0.000445434	-4.61863	-15.0868	-11.2634	-0.940142
53.9866	295.994	-0.314829	57.2898	136.318	-0.246014	65.498	393.531	-0.240615	73.2545	63.206	-0.520316	0.00071913	0.000780839	0.114794	1.13539	1.06696	0.197246	7.41434e-05	-4.23718	-12.3365	-16.7239	-0.676683
35.4402	12.605	-0.173364	82.6455	17.0493	-0.462652	73.316	82.3549	-0.720927	62.6907	15.4688	-0.741531	0.00063022	0.000655098	0.156587	0.424019	0.635643	0.229603	0.000272444	-3.39987	-9.66114	-45.9912	-0.69162
80.7321	628.097	-0.328362	81.3156	257.169	-0.278113	75.6766	296.918	-0.118259	70.7071	756.311	-0.345569	0.00497698	0.0020601	0.0847856	1.28019	2.39515	0.139161	1.34863e-05	-6.15881	-17.7931	-12.175	-0.28501
82.9679	821.266	-0.570835	81.7122	631.63	-0.467714	81.2125	834.592	-0.427106	80.2179	818.172	-0.547669	0.001793	0.00110754	0.0923577	0.757357	3.31519	0.133042	8.09487e-07	-2.7858	-15.3091	-13.8695	-0.00746379
28.8105	0	-0.184275	83.5883	0	-0.424719	71.8451	0.0072687	-0.8	83.4303	144.996	-0.8	0.000473486	0.000496613	0.17286	0.397293	0.393375	0.260397	2.69617e-05	-1.13431	-6.13298	-38.7424	-0.798795
72.681	888.511	-0.00721625	78.2524	287.841	0.58365	40.9994	410.103	0.0726111	83.3409	6.74656	-0.675989	0.75147	0.0173952	0.0829894	3.98955	2.90935	0.286196	0.00707232	-4.66961	-20.5452	-8.61658	-0.0633428
24.4993	0	0.170496	83.448	261.612	-0.8	83.6	727.172	-0.8	79.8786	15.7165	-0.8	0.000561248	0.000646561	0.159149	0.528075	0.141364	0.409438	2.7308e-05	-4.97156	-15.468	-10.5242	-0.892216
44.0394	72.4573	0.160784	82.9381	291.348	-0.225332	73.8801	705.05	-0.429427	76.9986	267.068	-0.229891	0.00619009	0.00217087	0.0884855	1.43516	1.56983	0.261776	0.000231004	-9.10622	-18.7709	-11.5121	-0.323664
22	63.1615	0.170496	83.448	261.612	-0.8	83.6	727.172	-0.8	83.6	5.65378	-0.8	0.000753405	0.000604866	0.163589	2.03182	0.270494	0.632623	0.000225606	-4.24438	-14.9064	-12.2732	-0.906657
44.4006	62.2729	0.0722916	82.5722	381.427	-0.235922	81.693	759.236	-0.724189	79.8833	160.134	-0.627233	0.00191238	0.00120566	0.0981797	1.03884	1.16746	0.185234	0.000254987	-4.73391	-17.5462	-12.4829	-0.515073
44.0394	72.4573	0.0702022	82.9381	291.348	-0.225332	73.8801	705.05	-0.429427	76.9986	267.068	-0.229891	0.00259716	0.00146582	0.0938103	1.24975	1.16954	0.22183	0.000229418	-7.85433	-17.4513	-11.5274	-0.502304
80.022	821.138	-0.465899	76.0098	581.683	-0.280821	81.1788	836.654	-0.199349	81.3895	753.21	-0.206215	0.00206158	0.00138786	0.0877212	1.08231	2.74082	0.119629	1.43629e-06	-3.64349	-15.8822	-13.927	-0.193301
83.6	492.353	-0.413525	82.3586	280.81	-0.640159	71.6317	0.00726124	-0.266411	64.1574	692.805	-0.301949	0.00143332	0.00107733	0.0912556	0.882101	2.24263	0.124174	1.4911e-05	-4.75084	-17.1161	-11.1421	-0.227756
83.5001	14.5059	-0.492572	59.163	151.072	-0.151014	83.2016	803.822	-0.526206	61.985	793.779	-0.017622	0.00126508	0.00105411	0.0923461	0.698401	1.8605	0.123595	7.38537e-05	-4.15076	-15.9315	-8.08658	-0.244172
47.7921	309.725	-0.272092	79.7415	114.854	-0.28776	76.9583	309.73	-0.658228	76.6275	335.657	-0.520901	0.000705417	0.000753722	0.114385	1.15581	1.26774	0.193686	4.62746e-05	-2.26668	-11.4484	-13.6884	-0.529768
40.4186	97.2962	-0.141456	83.4634	82.7409	-0.44193	72.0281	76.8461	-0.662726	79.2299	220.366	-0.594847	0.000528359	0.000627546	0.130702	1.1938	0.606284	0.220403	0.000236944	-4.08261	-12.3569	-23.6969	-0.765444
28.3748	34.8075	0.116828	81.4558	257.988	-0.696667	80.4986	698.89	-0.691248	81.6351	83.2359	-0.674849	0.000534115	0.00059333	0.136681	0.860409	0.148007	0.444129	0.000424486	-4.91095	-15.2282	-11.5772	-0.924137
72.6625	888.155	-0.0623141	78.2545	287.652	0.536441	48.5347	409.981	0.0722612	83.3409	6.7502	-0.706364	0.6899	0.013902	0.0843766	2.50047	2.29946	0.266126	0.0111197	-4.8836	-19.9327	-11.3578	-0.15834
31.153	10.3233	0.0658192	83.6	0	-0.727278	69.0215	0	-0.8	82.9765	122.712	-0.790698	0.00055561	0.000615537	0.143141	0.451122	0.257247	0.320925	0.000249567	-5.70509	-14.7981	-42.2978	-0.838331
44.5842	235.276	-0.0301371	83.5338	385.695	-0.602776	78.5558	564.768	-0.665926	74.4236	286.506	-0.507707	0.000642861	0.000734497	0.104596	1.30583	0.916052	0.169461	2.49655e-05	-4.04449	-15.8428	-15.1749	-0.661011
80.7162	894	-0.278343	75.8172	873.315	0.575719	73.7389	889.007	-0.392159	64.6726	753.068	0.0816825	0.723977	0.0154301	0.0815229	2.42668	2.84541	0.267645	0.00747387	-3.43677	-18.456	-10.8209	-0.168932
22	0	0.354534	83.6	0.406091	-0.8	76.2946	43.4794	-0.8	83.6	0	-0.8	0.00075728	0.000713765	0.136374	0.733315	0.092374	0.25448	3.09293e-05	-10.0581	-18.1602	-58.7506	-0.969806
80.7516	894	-0.274733	75.4546	875.909	0.577279	73.8229	891.566	-0.392111	64.5441	813.586	0.0951473	0.783032	0.0169605	0.0824363	2.42963	2.61803	0.288811	0.0098521	-3.4874	-18.5067	-10.0944	-0.185818
22	0	0.32233	82.9712	223.961	-0.8	75.6929	607.331	-0.8	83.6	0	-0.8	0.000788317	0.000768112	0.136125	0.700204	0.201904	0.362285	1.73428e-05	-7.70763	-17.6717	-10.2943	-0.864835
25.9535	116.441	0.261008	83.6	521.313	-0.577662	83.6	830.295	-0.8	78.4152	290.673	-0.768071	0.000869227	0.000781845	0.125683	1.77416	0.556909	0.383551	4.47571e-05	-5.21517	-17.3602	-11.6943	-0.757946
27.5402	0	-0.0233594	83.547	77.0819	-0.525418	75.3086	214.261	-0.8	83.4803	69.7171	-0.701743	0.000413327	0.000531428	0.185898	0.418895	0.118848	0.782895	7.93996e-05	-3.78779	-11.5195	-27.4595	-0.892669
25.8529	0	0.101492	83.6	263.37	-0.8	71.3769	329.566	-0.461285	66.2609	0	-0.131966	0.000478275	0.000600418	0.190787	0.46911	0.115318	1.28749	1.75427e-05	-5.65308	-14.3106	-18.6046	-0.938364
34.915	24.9232	0.0828884	83.6	82.2924	-0.511735	67.905	179.002	-0.8	81.6748	163.709	-0.603899	0.000698089	0.000781206	0.13221	0.580574	0.381417	0.221855	0.000368906	-5.91632	-15.9596	-28.2467	-0.732418
80.7516	894	-0.325365	79.386	875.909	0.577279	73.8229	891.566	-0.411313	64.5441	756.149	-0.0156605	0.685431	0.012525	0.0843588	1.76493	2.62979	0.200507	0.00713345	-2.71143	-17.8602	-10.7297	-0.221149
75.1742	821.132	-0.0266225	79.2829	181.246	0.799996	73.1788	884.627	-0.436933	83.6	190.597	0.8	1.45721	0.0267341	0.0796145	3.99491	2.30339	0.372862	0.0198742	-3.00456	-20.6378	-11.3694	-0.125898
74.5886	506.065	-0.384126	83.5843	49.6097	-0.122428	81.2108	861.398	-0.4835	83.6	648.218	-0.276532	0.0191583	0.00302968	0.0874252	1.68294	2.51881	0.121717	0.00140431	-3.78884	-15.9123	-13.3646	-0.174424
51.0732	439.692	-0.146947	62.7352	255.721	-0.689984	60.6914	704.949	-0.324985	83.6	143.419	-0.51285	0.0010084	0.000908173	0.108077	1.00029	1.41959	0.182095	3.40935e-05	-4.32737	-15.0415	-10.0867	-0.429151
22	77.9066	0.555386	83.6	98.8308	-0.8	83.6	566.163	-0.8	80.2918	0	-0.8	0.0624094	0.0059824	0.101802	3.98508	0.652388	0.674426	0.00339069	-5.41513	-20.7078	-12.4327	-0.732091
24.721	0	0.187542	83.6	309.094	-0.8	82.5985	719.329	-0.8	82.176	0	-0.744012	0.000560735	0.000626232	0.155996	0.552467	0.168563	0.841839	9.06948e-06	-5.28948	-15.8481	-10.4655	-0.877539
80.7516	894	-0.311033	75.4546	875.909	0.577279	73.8229	891.566	-0.411313	64.5441	756.149	-0.0156605	0.6814	0.0125707	0.0829688	1.80629	2.96392	0.200976	0.00432654	-3.1576	-18.0455	-10.7297	-0.0407797
68.7614	334.857	-0.232087	83.1582	284.763	-0.483951	72.475	264.458	-0.327556	68.9739	533.118	-0.274921	0.001142	0.00104503	0.0912744	1.07101	1.49913	0.114856	3.25115e-05	-5.83266	-17.111	-15.1511	-0.503947
69.8561	834.317	-0.01314	78.5778	259.073	0.575398	42.8808	385.089	-0.0572962	83.3463	56.1592	-0.683553	0.68937	0.013698	0.0865737	2.77631	1.98101	0.287641	0.0108499	-4.9413	-20.1315	-9.79353	-0.374894
27.89	19.3641	0.143693	83.3117	269.559	-0.646421	81.0024	721.26	-0.728042	81.8358	82.8898	-0.64764	0.000511963	0.000597628	0.133736	0.602927	0.145345	0.575487	0.000411351	-5.05084	-15.6604	-10.8414	-0.896167
72.681	888.511	-0.044998	78.2524	287.841	0.58365	47.6167	410.103	0.0726111	83.3409	6.74656	-0.675989	0.699309	0.014593	0.0836637	3.00111	2.42913	0.263985	0.00998908	-4.64737	-20.1308	-11.0227	-0.114291
31.4908	149.003	0.0985253	83.6	420.893	-0.59023	80.8796	754.298	-0.8	77.8688	150.155	-0.576758	0.000663104	0.000685199	0.128265	1.56112	0.558764	0.317006	5.58575e-05	-2.70062	-15.5342	-12.9073	-0.708735
22	0	0.170496	83.448	261.612	-0.8	83.6	727.172	-0.8	83.6	15.7165	-0.8	0.000536857	0.000597925	0.169314	0.549478	0.0587779	1.50388	2.62847e-05	-5.0113	-14.9124	-9.89676	-0.952436
83.5997	894	-0.494357	72.4774	331.519	-0.029397	82.9003	894	-0.390786	63.6339	794.781	0.00560005	0.0043612	0.00196418	0.0859296	1.68448	2.80875	0.121785	6.69247e-05	-3.43739	-16.1847	-10.0426	-0.1127
22	0	0.243474	83.6	133.279	-0.8	83.6	692.828	-0.8	83.6	0	-0.8	0.000597202	0.000632609	0.159358	0.557937	0.0961736	2.19415	2.89987e-05	-6.57226	-16.3463	-10.5898	-0.908741
28.5958	43.5025	-0.104337	83.5883	0	-0.424719	71.8451	0.0072687	-0.8	83.4303	92.2743	-0.8	0.000545973	0.000497502	0.173539	0.88715	0.336979	0.270498	0.000375367	-2.2844	-9.19043	-25.4244	-0.828495
72.681	888.511	-0.00721625	78.2524	287.841	0.588303	37.3177	410.146	0.0726111	83.3409	6.74656	-0.675989	0.741048	0.0169703	0.0829848	3.98821	2.71724	0.263833	0.00762442	-4.64248	-20.5452	-7.27057	-0.180703
24.4993	0	0.170496	83.448	261.612	-0.8	83.6	727.172	-0.8	83.6	15.7165	-0.8	0.000549469	0.00063411	0.157955	0.516865	0.132154	1.09119	2.6178e-05	-4.97156	-15.468	-10.5242	-0.892127
43.3733	351.672	0.0650646	80.3331	220.938	-0.185701	82.875	894	-0.405917	83.2056	359.968	-0.737873	0.0023316	0.00133495	0.0944737	1.2459	1.48612	0.204541	1.98192e-05	-4.70195	-17.243	-10.7938	-0.43559
44.0394	72.4573	0.182713	82.9381	291.348	-0.225332	73.8801	705.05	-0.429427	76.9986	267.068	-0.229891	0.00796816	0.00245017	0.0874893	1.51672	1.69262	0.239502	0.000230228	-9.38152	-19.0637	-11.5084	-0.274174
