# Supplementary material for: Optimal tuning of multi-PID controller using improved CMOCSO algorithm
Source: PeerJ Comput Sci. 2024 Nov 19;10:e2453. doi: 10.7717/peerj-cs.2453 (PMC11622856; doi:10.7717/peerj-cs.2453)
Supplement: Supplemental Information 5 [file peerj-cs-10-2453-s005.xlsx]

## Sheet: Sheet1
23.4128	619.809	-0.12213	28.6297	804.921	-0.2	71.1	233.7	-0.4	69.1	520.1	-0.3	0.00233084	0.00109529	0.162803	0.808994	2.15952	0.293744	1.256e-05	2.5674	-6.17419	-0.453712	-0.154499
67.672	203.911	-0.715189	61.3702	634.607	-0.2	71.1	233.7	-0.4	69.1	520.1	-0.3	0.00217571	0.00123418	0.114939	0.995436	2.53204	0.166568	7.29718e-05	-1.59477	-15.3101	-10.6134	-0.304955
27.7568	844.341	-0.243903	49.8453	526.582	-0.2	71.1	233.7	-0.4	69.1	520.1	-0.3	0.00189034	0.00102471	0.141389	0.804948	2.59097	0.237905	1.26001e-05	3.11676	-8.66723	-0.452564	-0.290857
79.8745	695.516	-0.559382	22.7961	793.625	-0.2	71.1	233.7	-0.4	69.1	520.1	-0.3	0.0027691	0.00141039	0.10792	0.864382	2.52571	0.161545	1.29775e-05	-4.40204	-14.8459	0.839048	-0.242399
56.8398	134.868	0.349671	29.4119	143.936	-0.2	71.1	233.7	-0.4	69.1	520.1	-0.3	5.09071	0.0482122	0.188904	3.99827	1.86347	0.742716	0.0225113	0.919212	-22.3685	-11.6599	-0.145824
42.7971	508.619	0.373618	79.9956	624.719	-0.2	71.1	233.7	-0.4	69.1	520.1	-0.3	4.9135	0.0432622	0.43595	3.99944	6.19177	3.45914	0.0174723	18.8002	-21.1165	-7.69683	2.39457
40.7824	364.164	-0.0523826	36.8442	56.6534	-0.2	71.1	233.7	-0.4	69.1	520.1	-0.3	0.000751275	0.000834918	0.124279	1.13724	0.825779	0.246273	7.68162e-05	-6.25031	-14.5549	-9.4756	-0.710139
55.1579	478.673	0.278005	42.1833	585.208	-0.2	71.1	233.7	-0.4	69.1	520.1	-0.3	5.0924	0.0468007	0.264105	3.99712	6.93768	1.6326	0.0417449	8.06286	-21.5059	-6.24537	5.25382
34.8134	560.994	0.730714	53.3389	754.788	-0.2	71.1	233.7	-0.4	69.1	520.1	-0.3	5.97037	0.0541207	0.234953	3.99399	11.3389	0.555033	0.0574517	-6.42358	-23.5764	-4.53694	10.1436
37.3999	836.354	0.43072	74.1386	306.065	-0.2	71.1	233.7	-0.4	69.1	520.1	-0.3	4.59817	0.0411947	0.625034	3.99887	36.8759	3.6715	0.0410964	18.7364	-21.0907	-3.05827	23.8622
75.5201	847.044	0.760115	26.1364	879.05	-0.2	71.1	233.7	-0.4	69.1	520.1	-0.3	5.56494	0.0515768	0.0658174	3.99738	43.5808	0.4547	0.0461977	-3.37224	-26.6278	0.284343	32.1253
56.4975	400.633	-0.52463	61.2659	710.4	-0.2	71.1	233.7	-0.4	69.1	520.1	-0.3	0.00130497	0.000955646	0.116853	1.01769	2.01031	0.186683	1.49501e-05	-1.88541	-12.577	-10.1167	-0.448259
54.9391	112.794	-0.466807	73.5786	398.666	-0.2	71.1	233.7	-0.4	69.1	520.1	-0.3	0.000787717	0.000770614	0.118665	0.994297	1.27885	0.192304	0.000149543	-2.88929	-11.0021	-14.543	-0.632622
70.5329	391.035	0.52178	29.7327	581.757	-0.2	71.1	233.7	-0.4	69.1	520.1	-0.3	5.55391	0.0516526	0.123211	3.9986	4.12834	0.4773	0.0159671	-5.14673	-24.8533	-2.27233	1.02845
35.338	805.916	-0.0179561	47.2576	744.683	-0.2	71.1	233.7	-0.4	69.1	520.1	-0.3	0.000821298	0.000776282	0.115023	0.595572	1.44958	0.23116	1.25975e-05	-3.49605	-13.957	-2.65309	-0.546574
41.9624	817.774	-0.639717	48.9062	652.091	-0.2	71.1	233.7	-0.4	69.1	520.1	-0.3	0.0170785	0.00346018	0.136562	2.07455	4.87386	0.22047	2.57131e-05	5.78572	-18.7244	-4.21807	0.277937
80.7183	738.328	0.799028	70.4873	599.664	-0.2	71.1	233.7	-0.4	69.1	520.1	-0.3	7.22295	0.0606636	0.0368656	3.99939	31.2011	0.539967	0.0623048	-2.8598	-27.1402	-14.617	16.2876
71.6396	444.539	0.484132	55.1671	569.1	-0.2	71.1	233.7	-0.4	69.1	520.1	-0.3	6.83133	0.0587417	0.11704	3.99801	2.47458	0.543502	0.0258375	-5.32428	-24.6757	-10.3616	-0.178774
64.5855	213.206	0.374185	22.2323	716.853	-0.2	71.1	233.7	-0.4	69.1	520.1	-0.3	5.21992	0.0491757	0.178852	3.99459	2.72685	0.52301	0.0280254	-3.54728	-23.2907	1.48808	0.993107
40.8828	148.092	-0.380178	55.5275	279.658	-0.2	71.1	233.7	-0.4	69.1	520.1	-0.3	0.000839249	0.000794914	0.141815	1.42239	1.26588	0.221408	7.9919e-05	-1.67341	-9.33187	-14.873	-0.627695
79.9573	625.136	0.693709	61.1044	27.9366	-0.2	71.1	233.7	-0.4	69.1	520.1	-0.3	7.13685	0.0602734	0.0711416	3.99921	46.633	0.563264	0.0465085	-3.47067	-26.5293	-15.7088	21.8043
58.527	869.798	0.698953	66.3035	242.929	-0.2	71.1	233.7	-0.4	69.1	520.1	-0.3	6.97542	0.0593805	0.0347121	3.99901	20.5762	0.47358	0.0592803	-4.84061	-25.1594	-8.23421	6.75906
67.162	438.364	-0.439528	31.0683	578.569	-0.2	71.1	233.7	-0.4	69.1	520.1	-0.3	0.00146623	0.00104454	0.111369	0.949945	1.65667	0.160374	1.61055e-05	-4.52468	-13.5662	-2.80704	-0.501122
34.3956	809.644	0.0188915	64.6824	423.373	-0.2	71.1	233.7	-0.4	69.1	520.1	-0.3	0.000709049	0.000734793	0.105947	0.620071	1.37253	0.220007	1.34492e-05	-3.92087	-14.532	-2.38778	-0.602787
27.0874	786.827	0.137485	62.7435	639.511	-0.2	71.1	233.7	-0.4	69.1	520.1	-0.3	0.000801448	0.000730224	0.122171	0.714377	1.36336	0.29123	1.26219e-05	-3.88157	-15.3112	-0.59433	-0.596021
80.65	133.993	-0.149869	62.2726	742.868	-0.2	71.1	233.7	-0.4	69.1	520.1	-0.3	0.0127769	0.00359901	0.0848228	2.24168	1.87393	0.183666	0.000135702	-9.3129	-19.9666	-9.03031	-0.448016
39.6674	799.312	0.587574	38.299	146.402	-0.2	71.1	233.7	-0.4	69.1	520.1	-0.3	5.27294	0.0498748	0.0395363	3.9998	130.501	0.559183	0.0274064	-1.716	-22.8114	-3.91458	85.6157
36.4674	128.91	0.77239	50.3332	24.8205	-0.2	71.1	233.7	-0.4	69.1	520.1	-0.3	5.84311	0.0536584	0.219866	3.99598	2.15369	1.06982	0.0327661	-5.94869	-24.0513	-14.5698	0.593767
49.6665	307.967	0.555806	57.7167	550.855	-0.2	71.1	233.7	-0.4	69.1	520.1	-0.3	6.42621	0.0563972	0.0144025	3.99967	44.4211	0.582351	0.0428303	-4.64765	-23.4563	-11.3386	18.36
82.8326	469.324	0.778702	68.4926	192.879	-0.2	71.1	233.7	-0.4	69.1	520.1	-0.3	7.23437	0.0606909	0.0362543	3.99947	24.213	0.670863	0.0634649	-2.84083	-27.1592	-15.5942	10.7172
70.5446	831.192	0.674516	60.3812	276.209	-0.2	71.1	233.7	-0.4	69.1	520.1	-0.3	7.01085	0.0596781	0.0541212	3.99918	99.309	0.49709	0.0515191	-4.17854	-25.8215	-11.6574	74.8886
61.7228	820.909	-0.565442	82.7925	645.014	-0.2	71.1	233.7	-0.4	69.1	520.1	-0.3	0.00173194	0.00112966	0.107233	0.95086	2.68357	0.15716	1.41745e-05	0.51223	-13.9834	-9.27675	-0.279791
82.8384	680.242	0.278212	22.4665	672.94	-0.2	71.1	233.7	-0.4	69.1	520.1	-0.3	5.57924	0.0512861	0.0439102	3.99732	35.1219	0.440527	0.0320681	-5.93062	-24.0694	0.330555	17.9366
43.2819	766.267	0.222721	65.0123	193.284	-0.2	71.1	233.7	-0.4	69.1	520.1	-0.3	0.00446551	0.00208888	0.087715	1.5387	1.76355	0.242736	2.67714e-05	-9.89686	-19.44	-5.07474	-0.473899
69.8855	681.484	-0.720315	73.0419	576.644	-0.2	71.1	233.7	-0.4	69.1	520.1	-0.3	0.00297975	0.00145524	0.108607	0.97266	3.26678	0.158804	1.29371e-05	0.186084	-16.1574	-13.1023	-0.122312
43.6117	321.654	-0.516523	64.5499	209.508	-0.2	71.1	233.7	-0.4	69.1	520.1	-0.3	0.00157447	0.0010175	0.135797	1.16853	2.28399	0.212704	2.78176e-05	0.354241	-13.8335	-11.5732	-0.358712
53.7575	831.394	-0.351481	51.1547	427.687	-0.2	71.1	233.7	-0.4	69.1	520.1	-0.3	0.00108434	0.0009237	0.108573	0.798509	1.70489	0.181015	1.33184e-05	-2.7275	-12.0182	-7.18426	-0.536797
63.7229	194.914	0.572775	52.5549	51.8914	-0.2	71.1	233.7	-0.4	69.1	520.1	-0.3	6.60694	0.0575841	0.0375523	3.99963	23.8509	0.713987	0.0602424	-5.29346	-24.7065	-15.0204	8.56714
24.0382	304.979	0.354068	40.9963	23.523	-0.2	71.1	233.7	-0.4	69.1	520.1	-0.3	0.00138358	0.00107129	0.12589	1.15192	0.869256	0.456562	6.81997e-05	-11.5546	-18.4454	-3.93537	-0.716362
39.2066	471.316	0.3925	38.5151	728.41	-0.2	71.1	233.7	-0.4	69.1	520.1	-0.3	0.876449	0.0192415	0.634885	3.99593	5.54649	3.05904	0.0208036	26.2577	-20.9095	-3.82239	2.13051
37.7302	123.727	-0.131516	43.0111	94.0128	-0.2	71.1	233.7	-0.4	69.1	520.1	-0.3	0.000612	0.000729835	0.158056	1.56482	0.541084	0.248973	0.000143398	-5.32203	-11.7771	-14.6115	-0.804507
45.5375	348.704	0.668293	83.1074	405.239	-0.2	71.1	233.7	-0.4	69.1	520.1	-0.3	6.6862	0.0579183	0.0765661	3.99912	9.22835	0.665728	0.0315135	-1.72435	-23.9851	-11.8295	5.9066
48.111	828.545	-0.722306	82.94	737.96	-0.2	71.1	233.7	-0.4	69.1	520.1	-0.3	0.026078	0.00429976	0.128391	2.92305	5.00266	0.207421	0.000181776	9.39733	-19.4253	-5.70598	0.337642
39.4787	710.221	0.309403	38.4494	232.496	-0.2	71.1	233.7	-0.4	69.1	520.1	-0.3	0.00766452	0.00276928	0.106479	2.16637	1.61566	0.264355	8.61192e-05	-10.0043	-19.9957	-4.49913	-0.493021
32.4899	92.3141	-0.118069	44.6575	737.937	-0.2	71.1	233.7	-0.4	69.1	520.1	-0.3	0.000603722	0.000648618	0.166959	1.5324	0.531895	0.274515	0.000155132	-4.74034	-10.3205	-3.19314	-0.766297
63.806	555.263	-0.478849	68.3685	611.197	-0.2	71.1	233.7	-0.4	69.1	520.1	-0.3	0.00103435	0.000892516	0.104128	0.935168	1.82863	0.146041	1.30104e-05	-3.35173	-12.7151	-13.4401	-0.485299
65.327	354.837	0.659268	69.0054	0.394061	-0.2	71.1	233.7	-0.4	69.1	520.1	-0.3	7.06474	0.0597909	0.0345062	3.99895	20.3207	0.64837	0.0593187	-4.60912	-25.3909	-15.506	6.63286
68.1881	443.588	-0.0107951	70.8485	431.725	-0.2	71.1	233.7	-0.4	69.1	520.1	-0.3	0.0157655	0.00384011	0.0841787	2.2835	2.07392	0.220297	2.78926e-05	-9.44319	-19.9493	-15.6227	-0.265759
46.4079	831.767	0.0270004	43.3276	514.437	-0.2	71.1	233.7	-0.4	69.1	520.1	-0.3	0.00104616	0.000950813	0.0996086	0.788546	1.47075	0.200771	1.25957e-05	-6.90229	-17.1614	-5.35735	-0.554543
46.3677	539.357	0.0698198	73.8456	232.104	-0.2	71.1	233.7	-0.4	69.1	520.1	-0.3	0.00172985	0.0012466	0.091603	1.04341	1.46393	0.198932	2.50484e-05	-8.4755	-17.8214	-8.36265	-0.487596
23.4603	381.264	0.497491	78.4511	719.368	-0.2	71.1	233.7	-0.4	69.1	520.1	-0.3	0.0207023	0.00439181	0.0902295	3.68722	2.16232	0.431083	0.000389948	-9.79267	-20.2073	-2.59518	-0.0420845
62.1963	872.916	-0.600617	83.1479	514.701	-0.2	71.1	233.7	-0.4	69.1	520.1	-0.3	0.00213487	0.00124624	0.107354	0.984544	2.96566	0.159244	1.36166e-05	1.16098	-14.8071	-8.88909	-0.199421
77.5094	17.96	0.230393	75.3933	804.476	-0.2	71.1	233.7	-0.4	69.1	520.1	-0.3	7.09811	0.0597993	0.0698765	3.99934	91.3633	0.792435	0.0165418	0.271513	-23.2694	-11.222	85.8463
27.2216	721.427	0.233679	71.1792	303.481	-0.2	71.1	233.7	-0.4	69.1	520.1	-0.3	0.00113675	0.000943812	0.101727	0.860608	1.41959	0.288302	1.7926e-05	-8.29177	-17.0934	-0.990091	-0.537249
51.0187	541.446	-0.321823	73.5009	430.834	-0.2	71.1	233.7	-0.4	69.1	520.1	-0.3	0.000748833	0.000759008	0.110208	0.954313	1.44399	0.201219	1.3595e-05	-3.22001	-11.5337	-9.73378	-0.595832
61.5552	290.771	-0.00137214	23.2697	306.994	-0.2	71.1	233.7	-0.4	69.1	520.1	-0.3	0.00303972	0.00170557	0.109674	1.35621	1.45321	0.226948	2.93352e-05	-9.34962	-19.169	-3.28585	-0.54709
61.4818	568.053	0.778966	72.0019	368.506	-0.2	71.1	233.7	-0.4	69.1	520.1	-0.3	7.01321	0.0596416	0.0546818	3.9996	133.597	0.581186	0.0312348	-4.1271	-25.8729	-12.7672	87.4584
69.1141	484.291	0.684842	55.0228	864.048	-0.2	71.1	233.7	-0.4	69.1	520.1	-0.3	6.74906	0.0583926	0.0358453	3.99967	21.5697	0.562647	0.0613237	-4.19954	-25.8005	-6.83515	7.56264
36.608	501.242	0.586695	32.9842	25.3697	-0.2	71.1	233.7	-0.4	69.1	520.1	-0.3	4.91194	0.0474908	0.0992766	3.9994	12.5621	0.645165	0.0179919	-0.333151	-22.5307	-5.78138	8.78588
56.5667	97.6647	-0.220163	47.8959	480.671	-0.2	71.1	233.7	-0.4	69.1	520.1	-0.3	0.000697174	0.000777087	0.104986	0.897969	0.850903	0.202308	0.000167474	-6.64345	-14.8552	-8.41194	-0.732274
28.7345	815.025	-0.531183	53.0684	805.546	-0.2	71.1	233.7	-0.4	69.1	520.1	-0.3	0.0255182	0.00407575	0.150215	2.97874	5.41396	0.256944	0.000178316	9.47761	-18.9685	-0.815987	0.490146
79.0417	846.347	0.314398	51.0381	278.841	-0.2	71.1	233.7	-0.4	69.1	520.1	-0.3	6.7972	0.0585425	0.0667422	3.9994	30.0593	0.526578	0.0248685	-5.97372	-24.0263	-13.547	14.9361
41.1342	67.8477	-0.437072	34.625	202.072	-0.2	71.1	233.7	-0.4	69.1	520.1	-0.3	0.00130066	0.000975727	0.156052	1.16244	1.30126	0.231222	0.000233385	-1.23673	-10.8725	-10.8994	-0.613807
27.8246	813.881	-0.618718	32.1763	620.813	-0.2	71.1	233.7	-0.4	69.1	520.1	-0.3	5.3554	0.041657	1.92526	3.99169	0.674558	3.90865	0.106576	-9.00187	-20.9981	-0.575205	-0.522701
56.7093	431.847	0.105763	26.6233	661.45	-0.2	71.1	233.7	-0.4	69.1	520.1	-0.3	0.00616004	0.00246113	0.103593	1.72685	1.72369	0.245645	1.83653e-05	-9.98859	-19.8219	-0.816373	-0.499202
47.313	191.451	-0.174313	51.976	753.436	-0.2	71.1	233.7	-0.4	69.1	520.1	-0.3	0.000615882	0.000694619	0.113968	1.23895	0.875236	0.19748	5.15447e-05	-5.87437	-13.5375	-6.3155	-0.704193
48.6901	416.417	0.672002	40.5766	712.911	-0.2	71.1	233.7	-0.4	69.1	520.1	-0.3	5.56046	0.0520985	0.0689342	3.99946	47.552	0.558652	0.0174071	-5.74029	-24.2597	-4.39291	41.0815
60.9511	554.072	0.590826	81.103	432.744	-0.2	71.1	233.7	-0.4	69.1	520.1	-0.3	7.05476	0.0597621	0.0572869	3.99942	31.7569	0.540037	0.0623429	-5.38656	-24.6134	-12.807	17.3502
74.4235	766.942	0.431149	80.614	230.213	-0.2	71.1	233.7	-0.4	69.1	520.1	-0.3	7.33279	0.0610451	0.170506	3.99701	7.16327	0.501002	0.0648324	-2.89327	-24.5075	-13.3908	6.0425
54.7606	674.639	0.130318	73.9757	86.1222	-0.2	71.1	233.7	-0.4	69.1	520.1	-0.3	0.0140681	0.00352267	0.0850753	2.13688	2.08969	0.240276	4.8069e-05	-9.70154	-19.8513	-9.1311	-0.286561
64.9633	686.666	0.458003	81.0474	72.8392	-0.2	71.1	233.7	-0.4	69.1	520.1	-0.3	7.17691	0.0602348	0.135722	3.99884	2.92592	0.52133	0.0341302	-1.04913	-23.9607	-11.9105	1.02086
51.7064	705.769	-0.722267	77.296	347.643	-0.2	71.1	233.7	-0.4	69.1	520.1	-0.3	0.0106485	0.00267659	0.125761	1.83209	4.30483	0.205946	1.54461e-05	5.93579	-18.5924	-7.77966	0.177441
60.4973	4.94799	0.690152	53.9778	59.1028	-0.2	71.1	233.7	-0.4	69.1	520.1	-0.3	6.58978	0.0575742	0.0697009	3.99978	20.8232	1.51466	0.0229281	-4.73254	-25.2675	-13.9233	8.53356
40.7998	138.131	-0.648746	43.9358	827.917	-0.2	71.1	233.7	-0.4	69.1	520.1	-0.3	0.00484719	0.00168668	0.154441	1.39663	3.27482	0.245076	8.75501e-05	2.36562	-17.0305	-2.98355	-0.0594476
61.4269	250.367	0.441129	77.3881	737.412	-0.2	71.1	233.7	-0.4	69.1	520.1	-0.3	6.8958	0.0588602	0.121386	3.99822	8.22236	0.629926	0.0215077	-0.69329	-23.5516	-13.5832	3.51655
66.2051	381.774	0.433639	49.4248	10.5202	-0.2	71.1	233.7	-0.4	69.1	520.1	-0.3	6.39162	0.056478	0.155466	3.99722	2.35238	0.565206	0.0255647	-6.11217	-23.8878	-15.5494	0.0100373
33.1005	10.7971	-0.586342	45.3783	745.736	-0.2	71.1	233.7	-0.4	69.1	520.1	-0.3	0.00304885	0.00129202	0.179986	1.02271	2.48474	0.265848	0.000214096	2.50419	-16.2707	-1.81464	-0.26232
30.1226	85.0336	0.70607	47.9468	226.467	-0.2	71.1	233.7	-0.4	69.1	520.1	-0.3	5.38085	0.0507066	0.205761	3.99796	1.96722	1.00381	0.0259057	-3.10104	-22.9891	-13.7849	-0.422612
73.9854	800	-0.0587644	40.8125	881.64	-0.2	71.1	233.7	-0.4	69.1	520.1	-0.3	0.014674	0.00384745	0.0868613	2.57404	2.18722	0.179579	8.69163e-05	-8.9131	-20.142	-3.39103	-0.356016
73.8551	232.247	0.0592825	58.938	493.421	-0.2	71.1	233.7	-0.4	69.1	520.1	-0.3	6.22314	0.0524743	0.34869	3.99848	3.0372	1.50142	0.0342394	10.045	-21.3772	-12.5356	1.25535
50.9625	591.587	-0.773793	33.9602	558.15	-0.2	71.1	233.7	-0.4	69.1	520.1	-0.3	0.0322289	0.004947	0.138629	2.5843	4.87846	0.217296	8.18227e-05	5.38701	-19.3806	-4.07957	0.296917
73.6021	62.1322	-0.581403	79.2074	625.298	-0.2	71.1	233.7	-0.4	69.1	520.1	-0.3	0.000988846	0.000910022	0.102842	0.727942	1.74244	0.138151	0.000152057	-3.04041	-13.2969	-14.45	-0.501359
68.906	114.56	0.257245	82.5581	19.2404	-0.2	71.1	233.7	-0.4	69.1	520.1	-0.3	6.97012	0.0588678	0.145843	3.99942	7.10571	0.70151	0.0474907	3.59983	-22.7083	-14.6157	5.12079
76.5109	212.425	0.176608	51.6333	258.769	-0.2	71.1	233.7	-0.4	69.1	520.1	-0.3	6.57823	0.0569344	0.0382476	3.9998	27.4073	0.839951	0.0552149	-0.601166	-22.7268	-15.0995	12.2934
75.2554	540.595	0.0466366	61.8668	849.994	-0.2	71.1	233.7	-0.4	69.1	520.1	-0.3	6.35751	0.0536009	0.518275	3.99854	6.62425	1.35071	0.0607617	10.1118	-21.3997	-8.7628	5.46679
69.3127	484.142	0.647694	52.3605	359.373	-0.2	71.1	233.7	-0.4	69.1	520.1	-0.3	6.68661	0.0580816	0.0377325	3.99939	34.643	0.562062	0.0591023	-4.41563	-25.5844	-13.9176	16.292
44.8895	162.632	0.545073	53.8601	658.39	-0.2	71.1	233.7	-0.4	69.1	520.1	-0.3	6.03091	0.0541636	0.0704841	3.99965	20.1658	0.689848	0.0247933	-2.46093	-22.9529	-7.75521	6.26973
73.6335	515.449	0.58796	32.7279	238.351	-0.2	71.1	233.7	-0.4	69.1	520.1	-0.3	5.69822	0.0526225	0.104828	3.99902	7.22483	0.521137	0.0256731	-4.49949	-25.5005	-9.36742	3.03341
31.8689	800.025	-0.0174417	81.2118	3.81049	-0.2	71.1	233.7	-0.4	69.1	520.1	-0.3	0.000796583	0.000778837	0.114385	0.709596	1.46314	0.226331	1.79274e-05	-2.25888	-13.0293	-1.77522	-0.562705
28.3174	780.144	-0.490069	48.5429	536.431	-0.2	71.1	233.7	-0.4	69.1	520.1	-0.3	0.0121068	0.00269881	0.15252	1.82915	4.77074	0.251492	1.40035e-05	7.59215	-17.923	-0.889935	0.264062
57.6818	490.432	-0.773461	42.5315	511.799	-0.2	71.1	233.7	-0.4	69.1	520.1	-0.3	0.0100537	0.00266383	0.129327	1.44671	3.97044	0.198468	1.37188e-05	2.3202	-18.2806	-7.33652	0.074029
28.2221	843.24	-0.289985	73.9045	85.1333	-0.2	71.1	233.7	-0.4	69.1	520.1	-0.3	0.00180927	0.000995924	0.137959	0.778367	2.75582	0.236744	4.76044e-05	3.60872	-10.882	-0.57226	-0.233552
65.2103	492.31	0.424277	51.4155	868.499	-0.2	71.1	233.7	-0.4	69.1	520.1	-0.3	6.45223	0.0567503	0.180292	3.99679	2.57297	0.587826	0.0343698	-6.03431	-23.7308	-5.92399	0.927959
27.9351	644.556	0.5545	31.3588	370.202	-0.2	71.1	233.7	-0.4	69.1	520.1	-0.3	4.03984	0.03906	0.150633	3.99872	7.88876	1.59876	0.0299628	10.2882	-21.334	-1.70903	5.70764
83.4554	809.443	0.539337	32.4319	50.469	-0.2	71.1	233.7	-0.4	69.1	520.1	-0.3	5.87656	0.0534645	0.158774	3.9978	7.56177	0.435865	0.0416398	-4.15286	-25.8471	-15.1837	6.33107
60.7452	883.18	0.322033	28.7923	194.046	-0.2	71.1	233.7	-0.4	69.1	520.1	-0.3	5.27982	0.0494144	0.0938378	3.9996	17.1362	0.570985	0.017712	0.50482	-22.4742	-8.60329	13.5246
64.9148	659.643	0.304335	51.5724	351.526	-0.2	71.1	233.7	-0.4	69.1	520.1	-0.3	6.37787	0.0559952	0.10035	3.99933	11.4407	0.569877	0.0287121	-0.733987	-22.7232	-12.2452	8.27741
80.8009	865.865	0.664401	71.9347	606.258	-0.2	71.1	233.7	-0.4	69.1	520.1	-0.3	7.26583	0.0609106	0.100689	3.9992	6.05166	0.520106	0.0182742	-3.59059	-26.4094	-13.8289	1.9909
68.1566	147.696	-0.574751	39.6634	742.259	-0.2	71.1	233.7	-0.4	69.1	520.1	-0.3	0.00147425	0.00102411	0.112948	0.820115	1.81363	0.16378	0.000114569	-3.56805	-12.854	-2.88511	-0.474794
34.7615	391.804	-0.233946	30.1344	407.207	-0.2	71.1	233.7	-0.4	69.1	520.1	-0.3	0.00139073	0.000961255	0.150946	0.988041	1.47379	0.245908	1.23671e-05	-1.32406	-7.91313	-4.58498	-0.497768
