# Supplementary material for: Optimal tuning of multi-PID controller using improved CMOCSO algorithm
Source: PeerJ Comput Sci. 2024 Nov 19;10:e2453. doi: 10.7717/peerj-cs.2453 (PMC11622856; doi:10.7717/peerj-cs.2453)
Supplement: Supplemental Information 6 [file peerj-cs-10-2453-s006.xlsx]

## Sheet: Sheet1
P	I	D	P	I	D	P	I	D	P	I	D	ITSE	se	tr	ts	td	overshoot	ess	Constraints
80.7404	8.86061	-0.435806	70.12	83.5257	-0.676045	56.9724	17.6591	-0.247423	83.1965	1.04523	-0.691573	0.00124484	0.000974518	0.100621	0.402797	1.66834	0.129617	0.000100504	-5.06959	-16.2199	-44.7109	-0.399615
22	0	0.0192652	82.2672	0	-0.45424	83.6	585.276	-0.44728	57.7138	330.487	-0.138521	0.00037987	0.000421085	0.25692	0.553277	0.0541852	1.64811	3.35861e-06	-5.18478	-10.9165	-12.8366	-0.965446
83.3088	334.571	-0.303239	61.7175	369.093	0.0951628	42.1247	0	0.307049	69.5689	0	-0.12447	0.0321119	0.00529838	0.0825995	2.57274	2.65595	0.268291	0.000150816	-8.13269	-18.4983	-17.0644	-0.0613492
83.6	883.699	-0.371927	79.9698	856.773	-0.378319	33.3629	23.7443	0.425911	67.6028	889.918	-0.18378	0.0208161	0.00331468	0.0837667	1.63118	2.69157	0.182974	0.000618771	-4.94926	-17.7125	-10.0039	-0.136232
22	0	0.347774	83.6	0	-0.8	83.6	822.212	-0.8	47.6509	104.562	-0.609229	0.000890608	0.00084323	0.149203	0.66835	0.287282	0.275842	3.88981e-05	-7.47697	-18.0599	-8.20914	-0.816429
22	0	0.153829	81.3449	0	-0.8	83.6	894	-0.8	42.1388	0	-0.8	0.00177228	0.00108481	0.204018	0.906372	0.364401	1.53921	4.37885e-06	-3.76704	-14.5495	-7.04285	-0.699813
64.5036	192.151	-0.500759	64.9608	339.843	-0.0942211	63.1345	227.097	-0.00456663	74.4748	234.75	-0.0572042	0.00109824	0.00100445	0.101753	1.61848	1.16223	0.152238	8.85675e-05	-3.35211	-12.3382	-19.0311	-0.65138
73.5041	6.01103	-0.381959	65.7095	265.937	-0.209305	51.2658	282.381	-0.0924562	83.2709	267.231	-0.41918	0.000847598	0.000914324	0.0957128	0.706774	1.22679	0.141757	4.95774e-05	-5.41725	-15.6393	-15.0276	-0.516318
68.9639	68.202	-0.315201	57.0822	442.829	0.0419768	59.1044	316.842	-0.135113	82.8321	16.8436	-0.511119	0.0010648	0.000961152	0.0927198	0.782624	1.25007	0.160436	0.000169079	-5.77648	-15.8173	-12.3748	-0.59563
22	0	0.0958815	83.0273	0	-0.578216	83.6	702.494	-0.631371	58.6021	260.616	-0.430354	0.000403851	0.000449233	0.280591	0.543328	0.0346798	1.17019	7.56593e-06	-5.06701	-13.1592	-10.4344	-0.979383
66.6262	216.676	-0.286727	58.1829	742.642	-0.00373333	53.6326	270.355	0.1186	76.7116	246.423	-0.229354	0.00165396	0.00126936	0.0924203	1.25597	1.36049	0.180772	6.06829e-05	-6.55033	-15.8353	-8.28098	-0.582775
79.1619	187.609	-0.514539	65.9795	266.502	-0.274893	50.8277	52.6817	0.0239155	75.5527	127.193	-0.420444	0.000917948	0.000919061	0.0982943	0.78619	1.43288	0.12783	0.00016874	-5.20441	-14.8827	-22.7194	-0.501544
75.3899	192.11	-0.428166	70.2394	395.497	-0.0868651	65.7914	184.847	-0.062223	75.0917	321.336	-0.0757757	0.00242625	0.00156772	0.0895328	1.60022	1.58379	0.1137	0.000113863	-5.50515	-15.3419	-18.9351	-0.497335
78.8094	513.434	-0.46451	70.0956	517.519	-0.286403	44.3048	37.6342	0.20442	72.3568	461.253	-0.278182	0.00121584	0.00107663	0.0927488	1.08471	1.77025	0.141958	6.55708e-05	-5.29092	-15.5812	-16.0277	-0.415828
22	0	0.348931	83.6	0	-0.8	83.6	817.021	-0.8	47.5521	87.0955	-0.590953	0.000872896	0.000829615	0.149612	0.66847	0.226011	0.278404	4.62396e-05	-7.50766	-18.0772	-8.29603	-0.836088
22	0	-0.228852	71.6312	0	-0.122941	83.6	303.374	-0.264998	65.5965	282.231	-0.0921635	0.000494847	0.000458163	0.228752	0.614981	0.213438	0.368267	1.59127e-05	-0.184398	-4.89167	-18.273	-0.927141
24.2123	0	0.204344	80.2759	23.2356	-0.8	83.6	894	-0.8	40.4603	0	-0.785387	0.00198817	0.00120026	0.176457	0.884779	0.502415	0.456613	2.26158e-05	-4.86227	-16.0625	-7.66239	-0.648729
80.079	0	-0.655532	79.7795	0	-0.468719	65.2158	108.104	-0.225125	83.6	52.3949	-0.648571	0.00128654	0.000964347	0.105034	0.428082	2.06938	0.141755	6.35844e-05	-3.17077	-13.9615	-37.0107	-0.273754
75.0508	612.88	-0.254781	77.6237	807.143	-0.228955	46.7763	188.344	0.153816	66.3152	879.387	-0.0845255	0.00426273	0.00200513	0.0844945	1.25898	2.19132	0.175666	9.76374e-06	-6.27167	-17.8647	-9.67945	-0.313181
74	647.65	-0.254781	77.6237	807.143	-0.228955	46.7763	117.072	0.153816	65.6312	879.387	-0.0845255	0.00368101	0.00188495	0.0845165	1.21622	2.11601	0.154929	3.13198e-05	-6.11775	-17.6956	-9.54229	-0.32051
64.5767	192.151	-0.500759	64.9608	339.843	-0.0942211	63.1345	169.048	0.00496017	72.8169	234.75	-0.0694308	0.000863629	0.000886402	0.102219	1.3707	1.14395	0.153012	9.82102e-05	-3.58569	-12.3491	-19.0309	-0.668143
66.6262	216.676	-0.286727	58.1829	759.982	-0.00373333	53.6326	270.355	0.1186	76.7116	246.423	-0.229354	0.00165027	0.00126606	0.0924204	1.25627	1.39755	0.156161	6.2259e-05	-6.55033	-15.8353	-8.06928	-0.557511
67.435	0	-0.413535	58.882	885.492	0.0861298	61.2509	5.94165	0.0866725	56.8558	545.773	0.07736	0.00176019	0.00135107	0.0967725	1.48874	1.11559	0.182978	3.13708e-05	-6.60064	-13.8076	-5.92486	-0.621004
71.7513	0	-0.413535	58.882	885.492	0.0861298	61.2509	5.94165	0.0866725	56.8558	545.773	0.07736	0.00246515	0.00160695	0.0921228	1.60218	1.29425	0.180602	4.06333e-05	-6.95434	-14.767	-6.05453	-0.573142
77.0584	131.354	-0.42285	72.2018	358.847	-0.218092	61.1205	233.283	-0.169774	71.7288	212.87	-0.244716	0.000972414	0.000980597	0.0928078	0.900377	1.41281	0.120187	0.000141247	-6.32213	-15.7356	-20.701	-0.55246
40.0641	0	-0.0709814	70.9792	163.477	-0.41673	75.7115	645.321	-0.594483	59.2858	21.6455	-0.673397	0.000583547	0.000703459	0.13997	0.480114	0.548211	0.211133	5.44546e-05	-4.2771	-13.9685	-12.1376	-0.743703
37.6932	0	0.105016	74.0591	130.439	-0.509636	77.1037	631.732	-0.561823	60.9574	42.2832	-0.590317	0.000566897	0.000699851	0.130697	0.543311	0.36285	0.204859	7.12213e-05	-7.03952	-16.891	-12.6	-0.867764
64.4858	126.798	-0.13854	65.2554	520.679	-0.0494941	66.7018	251.716	-0.245391	69.1853	554.06	-0.0817119	0.00412088	0.00191741	0.0878588	1.34062	1.61626	0.174393	0.000129977	-9.04051	-17.7556	-13.5177	-0.447088
78.8813	0	-0.277503	58.6047	894	-0.0501004	59.5888	0	-0.0574871	48.1973	585.387	0.0528463	0.00320181	0.00169988	0.086916	0.991222	1.74231	0.178244	4.01535e-07	-9.31176	-18.1371	-6.06114	-0.437772
69.3331	80.5712	-0.2755	70.3426	503.908	-0.117473	64.7771	249.481	-0.223225	69.2484	470.673	-0.106343	0.0017429	0.0012956	0.0909935	1.026	1.37937	0.181534	0.000160304	-7.64282	-16.5311	-15.287	-0.546109
80.8127	0	-0.557045	76.338	10.4505	-0.392129	65.0529	112.804	-0.154935	82.5499	140.916	-0.446306	0.000848856	0.000828251	0.0974557	0.449149	1.69699	0.129151	7.29536e-05	-4.43289	-14.602	-36.1441	-0.434647
65.6654	240.568	-0.277447	57.9809	738.601	-0.0178808	52.3398	231.486	0.154802	75.8541	276.27	-0.268373	0.00183464	0.00130834	0.0931247	1.37125	1.37167	0.155757	5.86599e-05	-6.51786	-15.7985	-8.38099	-0.588844
69.0451	209.88	-0.507266	67.5471	233.25	-0.250876	64.7966	121.089	0.019007	79.1121	70.8549	-0.279676	0.0009045	0.000915788	0.100371	1.17884	1.34885	0.131399	0.000141797	-3.75419	-13.0711	-25.4972	-0.583068
65.6219	75.2237	-0.395572	56.9385	345.772	-0.164904	62.0539	243.95	0.00610144	82.3966	54.5812	-0.392859	0.000771136	0.000831166	0.100611	0.833447	1.0203	0.162774	0.000197555	-4.74431	-13.7152	-15.1021	-0.652423
76.4102	23.1214	-0.432714	63.6695	245.17	-0.498209	56.0794	103.639	-0.19489	77.3953	72.4282	-0.521512	0.000967509	0.000938204	0.101404	0.480919	1.29757	0.135708	0.000163653	-5.67142	-15.4354	-22.2187	-0.555343
83.6	0	-0.342554	55.0474	602.337	-0.379888	43.4146	0	-0.381721	83.6	0	-0.8	0.00147377	0.00102788	0.104419	0.601465	1.62312	0.14742	4.18915e-07	-5.40311	-18.0138	-8.61449	-0.289242
83.6	0	-0.236559	46.4888	791.858	-0.109285	37.9486	0	-0.173218	81.0839	0	-0.8	0.00287527	0.00161846	0.0980583	0.992856	1.60863	0.156815	4.59711e-07	-6.19188	-19.3496	-4.03293	-0.324044
65.9607	0	-0.413535	58.882	885.492	0.0861298	61.2509	5.94165	0.0866725	52.7296	545.773	0.07736	0.00150226	0.00121775	0.098392	1.3662	1.05606	0.179085	3.24264e-05	-6.46781	-13.4642	-5.87668	-0.632346
73.5041	6.01103	-0.381959	65.7095	265.937	-0.243348	51.2658	408.198	-0.0882287	83.2709	267.231	-0.41918	0.000843277	0.000894365	0.0950961	0.688778	1.26762	0.140298	4.86346e-05	-5.41725	-15.6393	-11.0188	-0.514855
72.3249	6.01103	-0.381959	65.7095	265.937	-0.209305	51.2658	282.381	-0.0924562	83.3258	283.643	-0.41918	0.000810065	0.000889301	0.0965295	0.66518	1.18193	0.142941	4.92896e-05	-5.27625	-15.3998	-15.0092	-0.526845
68.9639	131.347	-0.315201	57.0822	442.829	0.0419768	59.1044	316.842	-0.135113	82.8321	16.8436	-0.511119	0.00108158	0.000964094	0.0932831	0.893844	1.29591	0.160762	0.000133675	-5.66627	-15.825	-12.7172	-0.586481
77.0584	131.354	-0.42285	72.2018	358.847	-0.183526	61.1205	233.283	-0.0413024	71.7288	212.87	-0.244716	0.00111443	0.0010673	0.0916618	0.983975	1.45217	0.117945	0.000142232	-6.30575	-15.7356	-20.7115	-0.542112
61.2045	58.993	-0.493119	51.8959	104.276	-0.381819	66.2455	5.86824	-0.121568	81.6053	0.570064	-0.507831	0.000912986	0.000789486	0.119423	0.486155	1.1734	0.186387	0.000217851	-2.98661	-11.7011	-29.7042	-0.601016
78.3755	35.9246	-0.446206	59.1524	128.034	-0.590135	57.3584	41.2886	-0.210157	81.6638	34.6624	-0.600401	0.00119317	0.000995909	0.1043	0.402541	1.4923	0.134648	0.000203577	-5.14731	-15.6238	-30.3875	-0.45952
79.1619	187.609	-0.339423	65.9795	266.502	-0.274893	52.0423	52.6817	0.0239155	75.5527	127.193	-0.420444	0.00142588	0.00121173	0.0908881	0.945514	1.48093	0.138292	0.000167481	-7.02807	-17.344	-22.7171	-0.537838
78.3632	16.302	-0.408045	68.7536	168.175	-0.543307	54.2034	71.0309	-0.227167	82.3694	5.06545	-0.609416	0.000996755	0.000913526	0.100107	0.42524	1.41118	0.148913	0.000135297	-5.47867	-16.1845	-30.6461	-0.467612
81.6122	151.636	-0.374465	57.4759	836.25	-0.409938	39.7489	25.3062	0.153356	67.4377	0	-0.420607	0.00136931	0.00107103	0.0953509	0.679155	1.44662	0.142797	0.000162604	-6.90096	-17.2672	-6.74675	-0.480818
76.2986	12.9892	-0.445357	62.0182	198.838	-0.486359	57.4675	106.03	-0.185999	79.5555	98.3097	-0.505909	0.000951501	0.000936809	0.102304	0.44476	1.2962	0.131997	0.000137509	-5.36162	-15.2191	-24.5941	-0.521106
76.2986	25.5696	-0.445357	62.2159	198.838	-0.486359	57.4675	76.309	-0.185999	79.5774	98.3097	-0.505909	0.000950514	0.000928463	0.102186	0.423333	1.31086	0.129835	0.00018038	-5.34074	-15.2225	-24.7271	-0.519982
62.3909	0	-0.298487	64.0598	173.784	-0.296274	61.9587	344.396	-0.175932	78.8741	257.967	-0.413545	0.000633351	0.000775203	0.100854	0.565225	0.851352	0.183131	3.51841e-05	-5.72462	-14.6943	-16.6527	-0.695836
30.1982	0	-0.233235	76.4452	0	-0.512215	83.6	638.07	-0.537878	56.0229	94.3704	-0.695202	0.000662402	0.000634407	0.172096	0.521722	0.578361	0.247022	4.11364e-05	-0.120105	-5.5298	-13.4478	-0.682393
42.4066	0	-0.165491	73.6907	65.6216	-0.330904	73.3739	499.333	-0.308868	74.1596	321.397	-0.360668	0.000386745	0.000569096	0.124321	0.528813	0.5049	0.203339	4.24142e-05	-5.74947	-12.3328	-14.9718	-0.816787
82.8198	245.607	-0.381036	70.3064	388.518	-0.413256	49.1448	80.9125	-0.0198781	78.1664	250.277	-0.421691	0.00136427	0.0011672	0.0911651	0.963276	1.69299	0.141216	0.000112338	-6.41865	-17.391	-19.2476	-0.420145
79.2964	0	-0.402641	59.6479	320.743	-0.436056	52.3415	61.0634	-0.201822	78.778	0	-0.594305	0.00101197	0.000914715	0.0999752	0.517593	1.29885	0.146503	5.3368e-05	-5.97847	-16.4357	-16.9053	-0.495564
56.9392	63.9518	-0.423566	64.2818	158.46	-0.181616	63.7402	129.916	-0.0627484	74.0465	193.088	-0.350175	0.000621244	0.000743567	0.114509	0.703539	0.862052	0.191725	0.000255763	-4.02808	-11.2312	-29.6775	-0.753479
22	0	0.424424	83.6	0	-0.8	83.6	861.72	-0.8	45.4533	2.68896	-0.739986	0.00155718	0.00112994	0.142852	0.989173	0.62258	0.230664	9.0771e-06	-5.0044	-19.1352	-7.58645	-0.74204
30.1042	0	0.131745	80.6895	31.7712	-0.635983	83.2205	659.534	-0.574353	54.4354	155.891	-0.49727	0.000478084	0.000618135	0.147059	0.520494	0.0967603	0.314852	4.63673e-05	-6.94748	-15.8937	-12.8492	-0.952868
72.9494	24.6321	-0.365952	62.8278	446.912	-0.32175	47.0806	67.629	-0.123799	74.2105	137.867	-0.570251	0.000889255	0.000914385	0.101253	0.506611	1.12102	0.149025	0.000175283	-5.90622	-15.7867	-14.0366	-0.559849
72.2125	276.318	-0.352948	75.3568	530.675	-0.225075	61.3535	270.928	-0.0428168	70.267	413.062	-0.349515	0.00115417	0.00104217	0.0914294	1.11771	1.52913	0.140158	3.88207e-05	-5.91746	-15.8858	-17.0529	-0.508398
76.067	23.84	-0.362036	55.33	772.815	-0.370096	42.519	99.1129	0.0509456	70.6172	0	-0.548326	0.00108191	0.000962373	0.0999676	0.61026	1.21706	0.14882	0.000124643	-6.90242	-16.4472	-6.37097	-0.598642
83.6	175.533	-0.439961	54.4814	894	-0.137182	33.4217	0	0.286233	70.2285	0	-0.370714	0.00127864	0.000999783	0.093142	0.751798	1.39531	0.165477	8.79803e-05	-7.27604	-16.7077	-5.6007	-0.558586
79.2005	0	-0.414617	68.3464	243.446	-0.36184	59.8299	228.104	-0.287624	83.2836	0	-0.773735	0.00112984	0.000977209	0.0979415	0.571241	1.60451	0.126878	2.08228e-05	-4.73535	-16.2414	-21.5978	-0.329214
63.242	142.645	-0.525742	60.0803	173.171	-0.200964	64.3101	146.975	-0.0479728	77.1329	147.452	-0.128406	0.000837072	0.00086233	0.108481	1.1826	1.11699	0.174601	0.000177969	-2.81522	-12.1622	-26.4765	-0.678887
83.6	0	-0.595454	75.2535	66.8548	-0.8	47.2936	0	-0.502901	83.6	0	-0.8	0.00284036	0.00146464	0.114731	0.549837	2.47462	0.161743	3.46002e-05	-3.67632	-14.7066	-51.9165	-0.13267
67.1141	99.1424	-0.403703	61.2128	459.479	-0.360621	54.7088	99.588	-0.0774469	71.8607	211.195	-0.331368	0.000782923	0.000840991	0.102688	0.750719	1.00531	0.150472	0.000197791	-5.71464	-13.9327	-13.4275	-0.670926
78.9847	236.504	-0.507707	66.2463	303.575	-0.275549	49.9261	95.9215	0.051158	75.0915	177.044	-0.402292	0.000951474	0.00095314	0.0973815	0.968965	1.48446	0.126668	0.000119563	-5.1923	-14.955	-21.0946	-0.491017
66.9029	0	-0.377394	60.5228	640.725	-0.191018	62.5972	37.5754	-0.0559099	62.8815	538.487	-0.0178963	0.000824113	0.00087264	0.0974731	0.724565	0.997791	0.182129	3.91589e-05	-7.05086	-14.3015	-9.29301	-0.65837
73.134	53.6079	-0.362656	61.2878	437.866	-0.235001	62.488	51.7008	-0.131189	72.642	350.076	-0.258196	0.000900916	0.000929847	0.0934239	0.701052	1.15741	0.141348	0.00018235	-6.75372	-15.8799	-13.8735	-0.608171
80.3493	45.0262	-0.452257	69.422	124.54	-0.587251	55.5898	26.2099	-0.18869	81.5358	28.1814	-0.631619	0.00109646	0.000940366	0.100392	0.411868	1.56676	0.129726	0.000202294	-5.16922	-15.9163	-36.606	-0.419236
77.897	41.7511	-0.460879	65.5545	355.674	-0.450776	55.1006	10.3051	-0.103133	76.2952	41.7293	-0.52871	0.000933817	0.000857595	0.100133	0.487315	1.37991	0.130018	0.00016624	-5.643	-15.3161	-17.9188	-0.526854
73.8016	86.8765	-0.46965	63.1191	218.562	-0.430222	59.0764	100.881	-0.102259	79.3614	60.3309	-0.453941	0.000881705	0.000883536	0.102378	0.60669	1.29553	0.130807	0.0002222	-4.92713	-14.373	-23.9771	-0.548647
77.6725	4.41284	-0.392796	61.376	376.665	-0.485764	57.7167	72.9367	-0.175887	59.2464	205.436	-0.38998	0.00103688	0.000994351	0.100892	0.601414	1.1769	0.129484	7.92126e-05	-7.01003	-16.2806	-15.5506	-0.573162
76.3813	111.288	-0.350374	56.9741	640.025	-0.178162	48.6068	160.339	-0.0614918	72.4965	7.82501	-0.400606	0.00100245	0.000936217	0.095184	0.75582	1.19385	0.160205	0.000153657	-7.33705	-16.6897	-8.85069	-0.626045
80.0625	15.5328	-0.471809	68.9134	108.141	-0.536236	55.9003	52.561	-0.253718	82.5222	0	-0.651882	0.00106386	0.000915668	0.101328	0.381143	1.50558	0.133254	0.00013771	-4.91046	-15.5737	-38.9702	-0.428575
78.4848	0	-0.48518	67.5561	72.0723	-0.641963	58.1433	58.2133	-0.248074	63.8511	70.0744	-0.558143	0.00131295	0.00107185	0.107557	0.399362	1.4975	0.140442	0.000125073	-5.72683	-15.0705	-44.5916	-0.444211
61.2045	58.993	-0.493119	51.8959	74.1186	-0.381819	66.2455	5.86824	-0.121568	81.6053	0.570064	-0.507831	0.000901643	0.000780022	0.118317	0.478774	1.14759	0.183096	0.000227526	-2.98661	-11.7011	-35.851	-0.602328
74.4795	103.224	-0.49732	76.3307	314.441	-0.298583	67.2072	282.509	-0.0804814	78.2915	12.3531	-0.635563	0.000995825	0.000911909	0.0982362	0.724817	1.653	0.132855	0.000156417	-4.40656	-14.147	-22.1137	-0.428708
73.5041	6.01103	-0.212384	65.7095	154.084	-0.243348	51.2658	408.198	-0.0882287	83.2709	267.231	-0.41918	0.00192245	0.0013954	0.0889797	0.926902	1.45885	0.153784	6.53827e-05	-7.25656	-18.1721	-11.0172	-0.498632
82.0911	36.5427	-0.38886	67.687	216.782	-0.450984	53.1058	103.932	-0.193819	81.5737	20.2582	-0.55816	0.00108659	0.000996307	0.0949228	0.556073	1.45815	0.146006	0.000166972	-6.17524	-17.1364	-26.0141	-0.459342
79.1619	187.609	-0.339423	65.9795	266.502	-0.274893	54.1262	52.6817	0.0239155	75.5527	129.717	-0.420444	0.0015188	0.00124409	0.0899452	0.974385	1.4844	0.13651	0.000165316	-7.02396	-17.344	-22.7171	-0.544067
77.4001	0	-0.539192	58.6036	85.6885	-0.293666	56.5765	63.0459	-0.0578303	78.8857	0	-0.50492	0.000864093	0.000822359	0.103449	0.42149	1.28014	0.133917	8.87893e-05	-4.74839	-14.1638	-37.415	-0.498258
78.9919	37.1087	-0.487567	67.2169	312.617	-0.428822	56.1167	16.7409	-0.121014	77.2671	87.6089	-0.548737	0.000949917	0.000885232	0.100007	0.475097	1.42978	0.136123	0.000171855	-5.27594	-15.1491	-20.3047	-0.490863
78.4411	27.2285	-0.434206	69.5263	179.767	-0.509409	48.3043	63.6999	-0.187046	81.2533	22.4389	-0.625545	0.00100858	0.000924943	0.100967	0.412803	1.39317	0.149392	0.00018064	-5.23263	-15.812	-29.9091	-0.455293
77.0584	131.354	-0.545841	72.2018	358.847	-0.218092	60.3987	242.904	-0.169774	71.7288	212.87	-0.244716	0.000849921	0.00087868	0.0987707	0.857557	1.55517	0.131503	0.00013893	-4.79939	-14.1141	-20.7047	-0.530323
74.6883	96.6352	-0.296522	60.0849	664.732	-0.0631347	49.9538	294.067	-0.0291394	77.5993	39.0895	-0.526837	0.00140889	0.00112197	0.0918916	0.82818	1.43586	0.161363	0.000164706	-6.75382	-17.1818	-9.31508	-0.53931
79.1619	187.609	-0.514539	65.9795	266.502	-0.274893	50.8277	113.376	0.0239155	75.5527	127.193	-0.427704	0.000935673	0.000939125	0.0980907	0.880909	1.46048	0.123896	0.000149801	-5.19579	-14.8827	-22.7194	-0.511082
74.9712	12.9892	-0.445357	62.0182	198.838	-0.486359	57.4675	147.484	-0.185999	79.5555	98.3097	-0.505909	0.000939566	0.000931013	0.102871	0.463369	1.2759	0.130389	0.000127322	-5.23175	-14.9484	-24.5781	-0.544685
83.5378	208.618	-0.374465	57.0592	836.25	-0.409938	39.7489	25.3062	0.179385	64.7065	0	-0.347788	0.00160942	0.00117685	0.0938818	0.812093	1.51837	0.141741	0.000132246	-7.03828	-17.5942	-6.86587	-0.462692
76.2986	25.5696	-0.445357	62.2159	198.838	-0.486359	57.4675	76.309	-0.208798	79.5774	98.3097	-0.505909	0.000952374	0.000927049	0.101235	0.456579	1.30859	0.130583	0.000180526	-5.34074	-15.2225	-24.7271	-0.519913
77.9849	37.1087	-0.487567	67.2169	312.617	-0.428822	56.1167	16.7409	-0.121014	77.2671	40.351	-0.548737	0.000925336	0.000853631	0.100819	0.477994	1.39327	0.134948	0.000168867	-5.25843	-14.9506	-20.2927	-0.515905
76.2986	25.5696	-0.445357	62.2159	198.838	-0.486359	57.4675	106.03	-0.185999	79.1984	98.3097	-0.505909	0.000957173	0.00093835	0.101969	0.433285	1.31599	0.130101	0.000173617	-5.37478	-15.2225	-24.7271	-0.522528
83.5455	176.52	-0.493519	60.4009	266.502	-0.339922	50.8277	52.6817	0.0239155	75.5527	127.193	-0.55167	0.00113733	0.00103811	0.0973994	0.773644	1.59145	0.128172	0.000174484	-5.56026	-15.9696	-20.2885	-0.414276
77.7229	36.5427	-0.360392	67.687	216.782	-0.450984	53.1058	112.634	-0.193819	81.5737	15.3665	-0.55816	0.00097203	0.000936717	0.0969473	0.553633	1.33639	0.142897	0.000169432	-6.07956	-16.7759	-25.9728	-0.508285
76.2986	2.75224	-0.445357	62.0182	198.838	-0.486359	58.3943	106.03	-0.185999	79.5774	98.3097	-0.574711	0.000983331	0.000953186	0.102692	0.423086	1.34386	0.129487	9.70704e-05	-5.15678	-15.2164	-24.5713	-0.49838
83.5378	151.636	-0.374465	57.0505	836.25	-0.409938	38.6096	25.3062	0.179385	67.4377	0	-0.347788	0.00156938	0.00117019	0.0935084	0.745092	1.50321	0.140578	0.000165351	-7.09597	-17.5886	-6.6565	-0.474798
77.7229	36.5427	-0.38886	67.687	216.782	-0.450984	53.1058	103.932	-0.193819	81.5737	12.534	-0.55816	0.000938008	0.000906758	0.0975695	0.487453	1.33451	0.143998	0.000170431	-5.81442	-16.3542	-25.9733	-0.501343
83.5378	208.618	-0.374465	57.4759	836.25	-0.341371	39.7489	25.3062	0.179385	67.4377	0	-0.347788	0.00157455	0.00117051	0.0917183	0.812615	1.54011	0.142514	0.000132042	-7.58755	-17.5942	-6.98521	-0.507554
79.1619	187.609	-0.514539	65.9795	266.502	-0.274893	54.2722	46.4197	0.0239155	75.5527	127.193	-0.420444	0.000927651	0.000928525	0.0965135	0.818463	1.52931	0.127428	0.000164614	-5.20441	-14.8827	-22.7194	-0.487491
79.1619	187.609	-0.514539	65.9795	266.502	-0.274893	50.8277	25.8945	0.0239155	76.5098	127.193	-0.46886	0.000923821	0.00090293	0.0983975	0.750197	1.48818	0.127828	0.000159939	-5.03548	-14.8827	-22.7194	-0.471372
83.5378	151.636	-0.374465	57.4759	836.25	-0.409938	39.7489	25.3062	0.179385	67.0218	0	-0.347788	0.00160779	0.00118293	0.0930406	0.788205	1.51423	0.139746	0.000163083	-7.07622	-17.5886	-6.76462	-0.478249
