# Supplementary material for: Optimal tuning of multi-PID controller using improved CMOCSO algorithm
Source: PeerJ Comput Sci. 2024 Nov 19;10:e2453. doi: 10.7717/peerj-cs.2453 (PMC11622856; doi:10.7717/peerj-cs.2453)
Supplement: Supplemental Information 7 [file peerj-cs-10-2453-s007.xlsx]

## Sheet: Sheet1
HV
Problem	M	D	CTSEA	CMOCSO	LMOCSO	NSGAII	TriP	BiCo	Two_CMOCSO_element
ZXH_CF1	7	12	3.1934e-1 (1.22e-1) -	7.9806e-1 (4.69e-2) -	8.6807e-1 (4.78e-2) -	6.2405e-1 (4.26e-2) -	4.9753e-1 (9.28e-2) -	2.9428e-1 (7.43e-2) -	9.4604e-1 (7.19e-3)
ZXH_CF2	7	12	2.9289e-2 (2.46e-2) -	2.5977e-1 (1.58e-1) -	2.4347e-1 (1.50e-1) -	1.4800e-1 (6.96e-2) -	6.0165e-2 (6.66e-2) -	1.0791e-3 (5.39e-3) -	6.8488e-1 (5.46e-2)
ZXH_CF3	7	12	1.5510e-4 (1.75e-4) -	1.0082e-3 (5.12e-4) -	4.5014e-3 (9.99e-4) -	1.1759e-4 (1.67e-4) -	3.7152e-3 (9.44e-4) -	6.7540e-5 (1.17e-4) -	1.0331e-2 (6.17e-4)
ZXH_CF4	7	12	5.3748e-5 (1.65e-4) =	1.6579e-5 (6.57e-5) -	1.7665e-4 (7.75e-4) =	4.4307e-6 (1.64e-5) -	4.4549e-5 (1.26e-4) =	5.2210e-5 (2.01e-4) -	3.2790e-4 (8.91e-4)
ZXH_CF5	7	12	4.5386e-4 (3.22e-4) -	3.4394e-4 (2.24e-4) -	6.9990e-4 (4.41e-4) -	4.9471e-4 (3.70e-4) -	3.3811e-4 (2.69e-4) -	4.0197e-4 (2.93e-4) -	1.2286e-3 (7.69e-4)
ZXH_CF6	7	12	4.1112e-4 (1.11e-4) -	6.0979e-4 (1.11e-4) -	4.5824e-4 (7.53e-5) -	4.8163e-4 (1.01e-4) -	3.7099e-4 (1.12e-4) -	4.5344e-4 (1.01e-4) -	1.5378e-3 (1.37e-4)
ZXH_CF7	7	12	8.7594e-3 (1.87e-2) +	0.0000e+0 (0.00e+0) =	1.0145e-3 (2.27e-3) =	8.9128e-3 (1.51e-2) +	4.3936e-3 (1.26e-2) =	8.3450e-3 (1.98e-2) +	7.8125e-4 (2.45e-3)
ZXH_CF8	7	12	9.1299e-3 (1.42e-2) -	2.3600e-2 (1.33e-2) -	2.6264e-2 (1.76e-2) -	2.5801e-2 (1.51e-2) -	1.2195e-3 (3.37e-3) -	6.4815e-3 (9.71e-3) -	5.1970e-2 (1.57e-2)
ZXH_CF9	7	12	4.2325e-4 (3.29e-4) -	8.2989e-4 (3.18e-4) -	2.4878e-3 (8.76e-4) -	4.9069e-4 (3.10e-4) -	1.0814e-3 (7.25e-4) -	2.0767e-4 (2.57e-4) -	4.3046e-3 (4.68e-4)
ZXH_CF10	7	12	1.0801e-4 (2.68e-4) =	8.4872e-6 (4.30e-5) =	1.0737e-5 (4.71e-5) =	7.0191e-5 (2.62e-4) =	8.1215e-5 (3.37e-4) =	2.0920e-4 (4.16e-4) +	3.3351e-5 (1.12e-4)
ZXH_CF11	7	12	1.8329e-1 (7.60e-2) -	5.9411e-1 (3.25e-2) -	4.1456e-1 (1.46e-1) -	2.2999e-1 (2.32e-2) -	9.6920e-2 (5.15e-2) -	3.5916e-2 (2.95e-2) -	6.4112e-1 (2.11e-2)
ZXH_CF12	7	12	5.8119e-1 (1.38e-1) -	5.8588e-1 (2.99e-1) -	6.9067e-1 (1.25e-1) -	5.9788e-1 (1.02e-1) -	5.2983e-1 (1.28e-1) -	4.6072e-1 (1.34e-1) -	8.9980e-1 (6.10e-2)
ZXH_CF13	7	12	1.5442e-2 (2.77e-2) =	0.0000e+0 (0.00e+0) -	9.3588e-3 (2.09e-2) =	2.8666e-2 (4.25e-2) +	2.4456e-3 (8.11e-3) -	4.2724e-3 (1.31e-2) =	6.4568e-3 (1.37e-2)
ZXH_CF14	7	12	4.7636e-1 (9.77e-2) -	8.4671e-1 (2.81e-2) -	7.6274e-1 (1.55e-1) -	5.8982e-1 (4.80e-2) -	4.6391e-1 (8.36e-2) -	2.9108e-1 (5.92e-2) -	9.3784e-1 (8.83e-3)
ZXH_CF15	7	12	3.6403e-4 (3.30e-4) -	8.5652e-4 (5.75e-4) -	2.1564e-3 (1.90e-3) -	6.2411e-4 (5.55e-4) -	2.3971e-3 (1.24e-3) -	3.3979e-4 (3.69e-4) -	5.1399e-3 (2.27e-3)
ZXH_CF16	7	12	5.2263e-4 (2.85e-4) -	2.4638e-3 (3.99e-4) -	5.2198e-3 (8.89e-4) -	7.3168e-4 (3.45e-4) -	2.4648e-3 (7.65e-4) -	2.4832e-4 (2.35e-4) -	1.0608e-2 (5.30e-4)
+/-/=			1/12/3	0/14/2	0/12/4	2/13/1	0/13/3	2/13/1
CPF
Problem	M	D	CTSEA	CMOCSO	LMOCSO	NSGAII	TriP	BiCo	Two_CMOCSO_element
ZXH_CF1	7	12	3.9869e-2 (4.63e-3) -	3.7371e-2 (6.90e-3) -	1.6397e-1 (5.57e-2) -	1.9922e-2 (5.47e-3) -	4.2051e-2 (7.48e-3) -	4.1444e-2 (6.05e-3) -	1.9682e-1 (1.75e-2)
ZXH_CF2	7	12	6.5456e-1 (3.52e-2) +	3.4951e-1 (1.01e-1) -	1.9261e-1 (1.81e-1) -	4.4465e-1 (3.69e-2) -	6.0559e-1 (5.48e-2) +	6.3247e-1 (3.19e-2) +	5.2320e-1 (5.01e-2)
ZXH_CF3	7	12	3.2932e-1 (4.98e-2) +	4.6797e-1 (4.39e-2) +	8.5131e-2 (2.49e-1) -	2.1119e-1 (5.55e-2) +	1.9309e-1 (6.40e-2) +	3.3236e-1 (4.67e-2) +	1.1566e-1 (2.07e-2)
ZXH_CF4	7	12	2.0195e-1 (7.07e-2) =	8.9574e-2 (7.54e-2) -	2.6854e-1 (2.89e-1) =	1.0390e-1 (4.87e-2) -	1.7577e-1 (7.59e-2) =	1.7200e-1 (9.07e-2) =	1.8362e-1 (1.32e-1)
ZXH_CF5	7	12	2.6023e-1 (4.95e-2) +	1.2817e-1 (3.71e-2) =	1.3143e-1 (1.54e-1) =	1.6009e-1 (4.14e-2) +	1.8453e-1 (5.97e-2) +	2.4923e-1 (6.17e-2) +	1.3058e-1 (1.03e-1)
ZXH_CF6	7	12	3.1510e-1 (2.43e-2) +	2.0253e-1 (4.39e-2) +	1.2334e-1 (9.26e-2) =	1.9832e-1 (3.01e-2) +	3.1928e-1 (3.37e-2) +	3.2777e-1 (3.49e-2) +	7.8823e-2 (2.70e-2)
ZXH_CF7	7	12	4.1948e-2 (1.30e-2) -	6.2852e-2 (5.30e-2) -	7.1458e-2 (6.12e-2) =	2.9271e-2 (1.23e-2) -	2.7152e-2 (1.39e-2) -	4.2676e-2 (1.22e-2) -	1.3036e-1 (6.05e-2)
ZXH_CF8	7	12	2.8128e-1 (3.71e-2) +	1.4051e-1 (5.48e-2) -	1.4703e-1 (1.01e-1) -	1.4652e-1 (2.21e-2) -	2.7222e-1 (3.34e-2) +	2.7554e-1 (3.51e-2) +	2.2639e-1 (7.01e-2)
ZXH_CF9	7	12	1.9834e-1 (4.30e-2) +	2.4238e-1 (3.77e-2) +	1.7520e-1 (3.01e-1) +	1.3234e-1 (2.48e-2) -	1.7028e-1 (3.49e-2) +	1.7745e-1 (3.43e-2) +	1.5215e-1 (3.02e-2)
ZXH_CF10	7	12	1.0926e-1 (5.65e-2) -	4.7748e-2 (2.66e-2) -	3.3350e-1 (2.82e-1) =	7.4542e-2 (3.87e-2) -	7.4655e-2 (4.33e-2) -	1.1247e-1 (5.11e-2) -	2.5583e-1 (2.27e-1)
ZXH_CF11	7	12	5.5537e-1 (4.50e-2) +	4.6062e-1 (5.86e-2) +	3.4650e-1 (1.74e-1) =	3.9726e-1 (3.84e-2) +	6.0802e-1 (3.20e-2) +	6.2501e-1 (3.18e-2) +	3.3965e-1 (5.77e-2)
ZXH_CF12	7	12	3.2283e-2 (7.19e-3) -	1.9790e-2 (1.21e-2) -	1.3924e-1 (5.51e-2) +	3.3344e-2 (1.25e-2) -	3.8694e-2 (1.58e-2) -	4.1487e-2 (7.41e-3) -	8.4566e-2 (3.28e-2)
ZXH_CF13	7	12	6.3735e-1 (3.78e-2) +	1.3430e-1 (6.76e-2) -	3.4587e-1 (2.86e-1) =	4.6450e-1 (4.27e-2) +	4.9799e-1 (7.25e-2) +	6.4169e-1 (3.03e-2) +	3.2179e-1 (1.30e-1)
ZXH_CF14	7	12	3.4927e-2 (5.44e-3) -	3.0534e-2 (5.41e-3) -	1.6474e-1 (7.33e-2) =	2.1075e-2 (6.20e-3) -	4.1189e-2 (7.08e-3) -	3.7443e-2 (5.85e-3) -	1.4652e-1 (1.49e-2)
ZXH_CF15	7	12	4.2124e-1 (8.51e-2) +	4.2868e-1 (1.01e-1) +	1.9756e-1 (2.48e-1) =	2.1572e-1 (4.18e-2) +	3.3186e-1 (1.24e-1) +	3.9085e-1 (7.92e-2) +	1.5080e-1 (3.11e-2)
ZXH_CF16	7	12	5.4002e-1 (5.13e-2) +	5.3776e-1 (3.96e-2) +	8.2778e-2 (5.84e-2) -	2.5162e-1 (3.73e-2) +	4.7809e-1 (7.94e-2) +	4.8204e-1 (5.00e-2) +	1.1235e-1 (1.91e-2)
+/-/=			10/5/1	6/9/1	2/5/9	7/9/0	10/5/1	10/5/1
DM
Problem	M	D	CTSEA	CMOCSO	LMOCSO	NSGAII	TriP	BiCo	Two_CMOCSO_element
ZXH_CF1	7	12	3.3499e-1 (4.11e-2) -	4.0016e-1 (4.44e-2) -	3.8452e-1 (5.69e-2) -	3.6105e-1 (4.78e-2) -	3.7973e-1 (5.28e-2) -	3.8031e-1 (4.20e-2) -	4.5519e-1 (4.24e-2)
ZXH_CF2	7	12	3.0301e-1 (3.25e-2) -	3.9533e-1 (4.79e-2) -	3.8781e-1 (1.31e-1) -	5.3249e-1 (3.28e-2) -	4.0819e-1 (3.44e-2) -	3.9226e-1 (3.59e-2) -	5.5587e-1 (2.86e-2)
ZXH_CF3	7	12	3.8347e-1 (3.51e-2) -	4.9837e-1 (1.77e-2) -	5.2745e-1 (1.39e-1) -	4.1421e-1 (3.45e-2) -	4.9491e-1 (5.62e-2) -	3.9501e-1 (3.13e-2) -	5.9116e-1 (1.62e-2)
ZXH_CF4	7	12	3.1076e-1 (5.44e-2) =	2.5983e-1 (8.23e-2) -	3.9629e-1 (2.17e-1) =	3.1086e-1 (5.16e-2) =	3.0219e-1 (5.13e-2) =	2.9299e-1 (7.22e-2) -	3.5403e-1 (1.12e-1)
ZXH_CF5	7	12	4.6796e-1 (6.19e-2) -	4.3049e-1 (9.12e-2) -	5.8094e-1 (1.05e-1) =	4.4510e-1 (1.06e-1) -	4.0930e-1 (7.51e-2) -	4.6969e-1 (1.09e-1) -	5.6777e-1 (7.95e-2)
ZXH_CF6	7	12	5.0661e-1 (4.29e-2) -	5.4732e-1 (4.73e-2) -	5.7183e-1 (5.75e-2) =	5.1689e-1 (4.31e-2) -	5.0413e-1 (4.59e-2) -	5.1552e-1 (3.67e-2) -	5.9564e-1 (4.02e-2)
ZXH_CF7	7	12	5.6082e-1 (6.84e-2) -	6.3060e-1 (1.97e-1) =	8.2456e-1 (1.12e-1) =	5.8445e-1 (7.97e-2) -	5.5147e-1 (8.69e-2) -	5.9659e-1 (6.64e-2) -	7.7508e-1 (1.32e-1)
ZXH_CF8	7	12	3.5266e-1 (8.81e-2) -	4.7521e-1 (8.21e-2) -	5.6452e-1 (1.63e-1) -	4.1940e-1 (4.85e-2) -	3.3183e-1 (5.92e-2) -	3.8115e-1 (6.96e-2) -	6.5574e-1 (6.31e-2)
ZXH_CF9	7	12	4.6232e-1 (3.49e-2) -	5.3644e-1 (3.52e-2) -	6.3869e-1 (1.70e-1) =	4.4997e-1 (2.84e-2) -	4.5834e-1 (5.95e-2) -	4.5134e-1 (3.85e-2) -	6.1764e-1 (2.30e-2)
ZXH_CF10	7	12	3.1910e-1 (8.28e-2) -	2.3504e-1 (6.75e-2) -	5.0774e-1 (2.23e-1) =	3.2239e-1 (9.09e-2) -	2.7148e-1 (5.78e-2) -	3.2773e-1 (8.84e-2) -	4.5735e-1 (1.39e-1)
ZXH_CF11	7	12	4.1442e-1 (4.30e-2) -	5.3250e-1 (3.35e-2) -	5.3132e-1 (9.31e-2) -	5.3148e-1 (3.41e-2) -	4.3627e-1 (3.90e-2) -	4.2136e-1 (3.77e-2) -	6.3586e-1 (2.43e-2)
ZXH_CF12	7	12	4.1823e-1 (6.72e-2) -	3.7437e-1 (7.06e-2) -	4.6982e-1 (5.74e-2) =	4.7997e-1 (5.69e-2) =	4.7055e-1 (5.60e-2) =	4.6462e-1 (5.77e-2) =	4.9464e-1 (4.53e-2)
ZXH_CF13	7	12	3.5166e-1 (6.24e-2) -	3.0728e-1 (1.05e-1) -	6.7790e-1 (1.96e-1) =	5.9065e-1 (3.20e-2) +	4.7277e-1 (4.50e-2) -	4.3865e-1 (3.14e-2) -	5.6939e-1 (1.76e-1)
ZXH_CF14	7	12	3.6746e-1 (5.87e-2) -	4.3648e-1 (4.26e-2) -	4.6655e-1 (6.51e-2) =	4.1940e-1 (5.17e-2) -	4.2605e-1 (5.56e-2) -	3.9501e-1 (5.52e-2) -	4.8420e-1 (4.17e-2)
ZXH_CF15	7	12	4.1985e-1 (3.31e-2) -	4.7889e-1 (5.94e-2) -	4.9072e-1 (1.16e-1) -	4.7253e-1 (4.37e-2) -	4.8621e-1 (5.86e-2) -	4.3640e-1 (5.21e-2) -	5.9174e-1 (5.02e-2)
ZXH_CF16	7	12	4.0537e-1 (2.58e-2) -	5.4511e-1 (2.60e-2) -	5.3298e-1 (4.16e-2) -	4.8599e-1 (3.67e-2) -	5.0165e-1 (3.75e-2) -	4.3933e-1 (2.77e-2) -	6.2197e-1 (2.32e-2)
+/-/=			0/15/1	0/15/1	0/7/9	1/13/2	0/14/2	0/15/1
GD
Problem	M	D	CTSEA	CMOCSO	LMOCSO	NSGAII	TriP	BiCo	Two_CMOCSO_element
ZXH_CF1	7	12	1.2260e-1 (5.44e-3) -	8.3570e-2 (6.80e-3) -	1.3538e-2 (2.45e-3) -	1.2720e-1 (3.43e-3) -	1.1682e-1 (4.48e-3) -	1.1174e-1 (2.39e-3) -	9.3343e-3 (8.98e-4)
ZXH_CF2	7	12	1.7992e-1 (4.41e-3) -	1.1464e-1 (2.22e-2) -	6.7476e-2 (7.38e-2) -	1.7325e-1 (5.47e-3) -	1.6029e-1 (8.16e-3) -	1.6406e-1 (4.03e-3) -	2.1690e-2 (3.71e-3)
ZXH_CF3	7	12	1.5264e-1 (1.91e-2) -	8.1353e-2 (1.48e-2) -	7.3128e-2 (4.40e-2) -	1.8453e-1 (3.62e-2) -	1.5320e-1 (2.65e-2) -	1.2546e-1 (1.41e-2) -	1.9701e-2 (7.89e-4)
ZXH_CF4	7	12	1.8943e-1 (5.51e-2) =	2.0972e-1 (8.99e-2) =	8.2464e-1 (8.74e-1) -	2.6136e-1 (4.04e-2) -	1.9491e-1 (6.88e-2) =	2.0801e-1 (7.27e-2) =	2.2237e-1 (2.07e-1)
ZXH_CF5	7	12	4.8787e-2 (1.85e-2) +	5.2626e-2 (4.09e-2) +	1.5743e-1 (1.79e-1) -	7.7770e-2 (6.17e-2) -	7.8406e-2 (8.37e-2) -	5.5788e-2 (4.12e-2) +	5.9589e-2 (1.08e-1)
ZXH_CF6	7	12	3.7540e-2 (6.68e-3) -	2.6838e-2 (2.06e-3) -	9.9214e-2 (2.50e-2) -	4.2429e-2 (9.92e-3) -	3.7228e-2 (5.61e-3) -	3.3502e-2 (2.85e-3) -	2.4018e-2 (1.75e-3)
ZXH_CF7	7	12	6.4590e-2 (1.05e-2) +	5.7492e-1 (2.87e-1) -	3.8161e-1 (3.16e-1) =	6.7733e-2 (7.09e-3) +	7.8195e-2 (2.13e-2) +	6.5664e-2 (1.00e-2) +	3.6909e-1 (2.07e-1)
ZXH_CF8	7	12	1.1710e-1 (3.17e-2) -	1.2812e-1 (7.82e-2) -	1.1139e-1 (6.88e-2) -	1.2576e-1 (1.15e-2) -	1.3685e-1 (1.45e-2) -	1.0995e-1 (2.17e-2) -	5.7481e-2 (2.47e-2)
ZXH_CF9	7	12	9.2814e-2 (1.66e-2) -	7.5450e-2 (1.71e-2) -	7.8385e-2 (3.50e-2) -	1.5461e-1 (9.55e-3) -	1.0753e-1 (1.98e-2) -	8.8784e-2 (1.02e-2) -	2.2624e-2 (6.09e-3)
ZXH_CF10	7	12	1.4525e-1 (5.02e-2) +	2.1985e-1 (1.14e-1) +	9.7049e-1 (7.21e-1) -	2.0307e-1 (6.56e-2) +	2.0387e-1 (6.22e-2) +	1.3818e-1 (5.69e-2) +	5.3625e-1 (5.75e-1)
ZXH_CF11	7	12	1.3017e-1 (2.08e-2) -	5.7822e-2 (1.35e-2) -	3.2902e-2 (2.66e-2) -	1.5501e-1 (5.87e-3) -	1.6127e-1 (5.58e-3) -	1.4748e-1 (5.55e-3) -	1.7465e-2 (9.89e-4)
ZXH_CF12	7	12	1.0135e-1 (7.61e-3) -	9.4837e-2 (6.55e-2) -	3.3392e-2 (2.64e-2) -	9.3571e-2 (1.65e-2) -	7.9780e-2 (1.12e-2) -	8.8746e-2 (9.07e-3) -	1.5187e-2 (1.21e-2)
ZXH_CF13	7	12	1.6841e-1 (9.67e-3) =	3.0453e-1 (1.91e-1) =	5.3463e-1 (3.18e-1) -	1.5881e-1 (6.96e-3) =	1.5988e-1 (1.15e-2) =	1.5412e-1 (9.97e-3) =	3.7755e-1 (4.45e-1)
ZXH_CF14	7	12	1.1065e-1 (2.19e-3) -	8.1334e-2 (5.68e-3) -	3.3462e-2 (2.44e-2) -	1.1409e-1 (3.04e-3) -	9.9666e-2 (5.79e-3) -	1.0557e-1 (2.13e-3) -	1.1297e-2 (8.24e-4)
ZXH_CF15	7	12	9.7226e-2 (2.80e-2) -	9.0379e-2 (3.37e-2) -	1.7231e-1 (2.10e-1) -	1.0957e-1 (2.70e-2) -	9.1082e-2 (2.49e-2) -	9.5612e-2 (3.25e-2) -	2.5134e-2 (7.28e-3)
ZXH_CF16	7	12	8.8133e-2 (7.96e-3) -	6.8570e-2 (1.53e-2) -	5.3166e-2 (6.59e-3) -	9.7360e-2 (2.02e-2) -	1.0423e-1 (1.06e-2) -	9.0188e-2 (8.31e-3) -	1.9552e-2 (1.07e-3)
+/-/=			3/11/2	2/12/2	0/15/1	2/13/1	2/12/2	3/11/2
IGD
Problem	M	D	CTSEA	CMOCSO	LMOCSO	NSGAII	TriP	BiCo	Two_CMOCSO_element
ZXH_CF1	7	12	6.9626e-1 (9.41e-2) -	4.2959e-1 (3.13e-2) -	2.8974e-1 (7.25e-2) -	4.7969e-1 (5.04e-2) -	5.1838e-1 (7.99e-2) -	7.2532e-1 (8.77e-2) -	1.9579e-1 (2.91e-3)
ZXH_CF2	7	12	1.0153e+0 (1.79e-1) -	6.3256e-1 (1.15e-1) -	8.9871e-1 (2.28e-1) -	8.5066e-1 (1.78e-1) -	9.4990e-1 (1.93e-1) -	1.3314e+0 (1.46e-1) -	3.9979e-1 (2.22e-2)
ZXH_CF3	7	12	6.6548e-1 (5.08e-2) -	4.6322e-1 (1.42e-2) -	6.6739e-1 (4.10e-2) -	6.2252e-1 (4.51e-2) -	5.1308e-1 (3.81e-2) -	6.3811e-1 (3.91e-2) -	4.3403e-1 (1.28e-2)
ZXH_CF4	7	12	9.1162e-1 (2.66e-1) =	1.2246e+0 (4.87e-1) -	1.7681e+0 (1.11e+0) -	1.2274e+0 (5.42e-1) -	1.0444e+0 (4.11e-1) =	1.1187e+0 (5.22e-1) =	8.7579e-1 (3.02e-1)
ZXH_CF5	7	12	3.2013e-1 (8.87e-2) +	3.6752e-1 (1.84e-1) =	5.7663e-1 (2.70e-1) -	4.5811e-1 (4.86e-1) -	3.7144e-1 (1.03e-1) =	3.8130e-1 (2.42e-1) -	3.7139e-1 (1.54e-1)
ZXH_CF6	7	12	2.6891e-1 (1.69e-2) +	2.6912e-1 (1.16e-2) +	5.3126e-1 (4.10e-2) -	2.6501e-1 (1.28e-2) +	2.7325e-1 (1.55e-2) +	2.6521e-1 (1.07e-2) +	3.3143e-1 (2.27e-2)
ZXH_CF7	7	12	3.9369e-1 (1.13e-1) +	9.0453e-1 (2.10e-1) -	5.3918e-1 (2.69e-1) =	3.9309e-1 (1.05e-1) +	5.3414e-1 (1.56e-1) =	3.9940e-1 (1.14e-1) +	5.7324e-1 (1.52e-1)
ZXH_CF8	7	12	6.9207e-1 (3.18e-1) -	4.6498e-1 (6.62e-2) -	5.6329e-1 (6.49e-2) -	4.8211e-1 (7.13e-2) -	7.7733e-1 (1.74e-1) -	6.0186e-1 (1.44e-1) -	3.7518e-1 (4.72e-2)
ZXH_CF9	7	12	4.5048e-1 (3.72e-2) =	3.6314e-1 (1.83e-2) +	7.1877e-1 (5.90e-2) -	5.2202e-1 (2.98e-2) -	4.8952e-1 (4.65e-2) -	4.7438e-1 (3.76e-2) -	4.4746e-1 (2.35e-2)
ZXH_CF10	7	12	7.5766e-1 (3.03e-1) +	1.1896e+0 (5.08e-1) =	1.6300e+0 (8.53e-1) -	1.0392e+0 (4.52e-1) =	1.1996e+0 (5.19e-1) =	7.8193e-1 (3.44e-1) +	1.1948e+0 (6.68e-1)
ZXH_CF11	7	12	5.8349e-1 (6.50e-2) -	3.3271e-1 (1.27e-2) -	5.5592e-1 (2.03e-1) -	6.7392e-1 (3.97e-2) -	6.6889e-1 (6.03e-2) -	7.8246e-1 (8.26e-2) -	3.2404e-1 (1.19e-2)
ZXH_CF12	7	12	4.6373e-1 (9.65e-2) -	4.8532e-1 (2.25e-1) -	3.5085e-1 (9.40e-2) -	4.2567e-1 (8.82e-2) -	4.7140e-1 (9.41e-2) -	5.2516e-1 (9.91e-2) -	2.2208e-1 (5.47e-2)
ZXH_CF13	7	12	1.1424e+0 (2.58e-1) =	1.6784e+0 (3.36e-1) -	1.4401e+0 (3.25e-1) =	1.1145e+0 (2.13e-1) =	1.2878e+0 (2.31e-1) =	1.2406e+0 (1.64e-1) =	1.2906e+0 (4.50e-1)
ZXH_CF14	7	12	5.9614e-1 (6.35e-2) -	3.8861e-1 (2.51e-2) -	3.2787e-1 (8.73e-2) -	5.1253e-1 (4.15e-2) -	5.9150e-1 (8.05e-2) -	7.3113e-1 (7.61e-2) -	2.0427e-1 (5.19e-3)
ZXH_CF15	7	12	5.2657e-1 (1.10e-1) -	4.7627e-1 (1.94e-1) -	7.7695e-1 (4.35e-1) -	5.1446e-1 (6.54e-2) -	4.8504e-1 (5.83e-2) -	5.5269e-1 (1.52e-1) -	4.0886e-1 (3.34e-2)
ZXH_CF16	7	12	5.2786e-1 (2.41e-2) -	4.0281e-1 (1.16e-2) +	6.2214e-1 (3.29e-2) -	5.0716e-1 (3.38e-2) -	4.9279e-1 (3.15e-2) -	5.4370e-1 (2.97e-2) -	4.5522e-1 (2.00e-2)
+/-/=			4/9/3	3/11/2	0/14/2	2/12/2	1/10/5	3/11/2
IGDp
Problem	M	D	CTSEA	CMOCSO	LMOCSO	NSGAII	TriP	BiCo	Two_CMOCSO_element
ZXH_CF1	7	12	6.0337e-1 (1.31e-1) -	3.4338e-1 (3.15e-2) -	1.9519e-1 (5.05e-2) -	3.4261e-1 (5.05e-2) -	4.1366e-1 (9.57e-2) -	6.7136e-1 (1.17e-1) -	1.3653e-1 (2.55e-3)
ZXH_CF2	7	12	8.2842e-1 (2.11e-1) -	4.6407e-1 (1.03e-1) -	6.4094e-1 (2.67e-1) -	7.0732e-1 (2.03e-1) -	8.1403e-1 (2.26e-1) -	1.2346e+0 (2.16e-1) -	2.6304e-1 (3.17e-2)
ZXH_CF3	7	12	5.2179e-1 (6.60e-2) -	3.4411e-1 (1.99e-2) -	3.7133e-1 (3.20e-2) -	4.9398e-1 (5.14e-2) -	3.3425e-1 (3.08e-2) -	5.2481e-1 (5.00e-2) -	2.3388e-1 (5.80e-3)
ZXH_CF4	7	12	8.4773e-1 (3.02e-1) =	1.1741e+0 (5.13e-1) -	1.7342e+0 (1.14e+0) -	1.1913e+0 (5.69e-1) -	9.9055e-1 (4.36e-1) =	1.0618e+0 (5.46e-1) =	8.1432e-1 (3.36e-1)
ZXH_CF5	7	12	2.5777e-1 (1.07e-1) =	2.9933e-1 (2.00e-1) -	3.7007e-1 (3.26e-1) -	3.9738e-1 (5.07e-1) =	2.8583e-1 (6.82e-2) -	3.2620e-1 (2.63e-1) -	2.6088e-1 (1.85e-1)
ZXH_CF6	7	12	1.9061e-1 (1.71e-2) -	1.8832e-1 (1.29e-2) -	2.6438e-1 (1.95e-2) -	1.8588e-1 (1.36e-2) -	2.0318e-1 (1.86e-2) -	1.8816e-1 (1.26e-2) -	1.6366e-1 (1.08e-2)
ZXH_CF7	7	12	3.8567e-1 (1.18e-1) +	8.9777e-1 (2.12e-1) -	5.2217e-1 (2.77e-1) =	3.7943e-1 (1.12e-1) +	5.2528e-1 (1.59e-1) =	3.9169e-1 (1.18e-1) +	5.6614e-1 (1.52e-1)
ZXH_CF8	7	12	6.5464e-1 (3.29e-1) -	4.0363e-1 (6.56e-2) -	4.1443e-1 (8.96e-2) -	4.1393e-1 (8.19e-2) -	7.4666e-1 (1.84e-1) -	5.5019e-1 (1.55e-1) -	3.1894e-1 (4.38e-2)
ZXH_CF9	7	12	3.4446e-1 (3.49e-2) -	2.7353e-1 (1.97e-2) -	4.0776e-1 (5.95e-2) -	3.6970e-1 (2.66e-2) -	3.5677e-1 (4.69e-2) -	3.7983e-1 (3.17e-2) -	2.5867e-1 (1.30e-2)
ZXH_CF10	7	12	6.9710e-1 (3.24e-1) +	1.1390e+0 (5.32e-1) =	1.6009e+0 (8.81e-1) -	9.8792e-1 (4.83e-1) =	1.1513e+0 (5.54e-1) =	7.1513e-1 (3.78e-1) +	1.1388e+0 (6.80e-1)
ZXH_CF11	7	12	4.6614e-1 (8.05e-2) -	2.0301e-1 (2.49e-2) -	3.6994e-1 (1.41e-1) -	5.3601e-1 (3.46e-2) -	5.7015e-1 (6.74e-2) -	6.9631e-1 (9.11e-2) -	1.5363e-1 (1.80e-2)
ZXH_CF12	7	12	4.0516e-1 (1.12e-1) -	4.2408e-1 (2.26e-1) -	2.6025e-1 (9.43e-2) -	3.2473e-1 (9.74e-2) -	4.1884e-1 (1.15e-1) -	4.8149e-1 (1.17e-1) -	1.7385e-1 (5.44e-2)
ZXH_CF13	7	12	9.9698e-1 (3.14e-1) +	1.5892e+0 (3.45e-1) -	1.3430e+0 (3.44e-1) =	1.0546e+0 (2.44e-1) =	1.2375e+0 (2.49e-1) =	1.1804e+0 (1.88e-1) =	1.2114e+0 (4.46e-1)
ZXH_CF14	7	12	5.1838e-1 (7.73e-2) -	3.2929e-1 (2.58e-2) -	2.4252e-1 (7.03e-2) -	3.9968e-1 (3.92e-2) -	5.3454e-1 (1.04e-1) -	7.0333e-1 (9.56e-2) -	1.5923e-1 (5.70e-3)
ZXH_CF15	7	12	4.0835e-1 (1.29e-1) -	3.7442e-1 (2.19e-1) -	5.7440e-1 (5.16e-1) -	3.8522e-1 (7.47e-2) -	3.1979e-1 (6.18e-2) -	4.4186e-1 (1.77e-1) -	2.5204e-1 (6.25e-2)
ZXH_CF16	7	12	3.7452e-1 (2.22e-2) -	2.7240e-1 (1.05e-2) -	3.2451e-1 (2.35e-2) -	3.6954e-1 (3.21e-2) -	3.2749e-1 (2.92e-2) -	4.1626e-1 (3.43e-2) -	2.2702e-1 (9.70e-3)
+/-/=			3/11/2	0/15/1	0/14/2	1/12/3	0/12/4	2/12/2
